1 **A network of MAP-Kinase pathways and transcription factors regulates cell-**  
2 **to-cell communication and cell wall integrity in *Neurospora crassa***

3 Monika S. Fischer\*, Vincent W. Wu\*<sup>†</sup>, Ji E. Lee<sup>§</sup>, Ronan C. O'Malley<sup>§</sup>, N. Louise

4 Glass\*<sup>†,‡</sup>

5 \*The Plant and Microbial Biology Department, The University of California, Berkeley,

6 CA 94720-3102, <sup>†</sup>The Energy Biosciences Institute, The University of California,

7 Berkeley, CA 94720-3102, <sup>‡</sup>Environmental Genomics and Systems Biology Division,

8 Lawrence Berkeley National Laboratory, Berkeley, CA 94720, <sup>§</sup>U.S. Department of

9 Energy, Joint Genome Institute, Walnut Creek, CA 94598, USA.

10

11

12 NCBI Sequence Read Archive reference numbers: RNAseq data (SRP133239) and DAP-

13 seq data (SRP133627).

14 **Short running title:** ADV-1 and PP-1 in *N. crassa*

15 **Keywords:** *Neurospora crassa*, MAP Kinase, Regulatory Networks, DAP-seq, cell-to-cell

16 communication, cell fusion

17

18 **Corresponding Author**

19 N. Louise Glass

20 University of California, Berkeley

21 Department of Plant & Microbial Biology

22 341A Koshland Hall

23 Berkeley, California 94720

24 510.643.2546

25 [lglass@berkeley.edu](mailto:lglass@berkeley.edu)

26

27

28

29 **ABSTRACT**

30 Maintenance of cell integrity and cell-to-cell communication are fundamental biological  
31 processes. Filamentous fungi, such as *Neurospora crassa*, depend on communication to  
32 locate compatible cells, coordinate cell fusion, and establish a robust hyphal network.  
33 Two MAP-Kinase pathways are essential for communication and cell fusion in *N. crassa*;  
34 the Cell Wall Integrity/MAK-1 pathway and the MAK-2 (signal response) pathway.  
35 Previous studies have demonstrated several points of cross talk between the MAK-1 and  
36 MAK-2 pathways, which is likely necessary for coordinating chemotropic growth toward  
37 an extracellular signal, and then mediating cell fusion. Canonical MAP-Kinase pathways  
38 begin with signal reception and end with a transcriptional response. Two transcription  
39 factors, ADV-1 and PP-1, are essential for communication and cell fusion. PP-1 is the  
40 conserved target of MAK-2, while it is unclear what targets ADV-1. We did RNAseq on  
41  $\Delta adv-1$ ,  $\Delta pp-1$ , and wild-type cells and found that ADV-1 and PP-1 have a shared regulon  
42 including many genes required for communication, cell fusion, growth, development, and  
43 stress response. We identified ADV-1 and PP-1 binding sites across the genome by  
44 adapting the *in vitro* method of DNA-Affinity Purification sequencing (DAP-seq) for *N.*  
45 *crassa*. To elucidate the regulatory network, we misexpressed each transcription factor in  
46 each upstream MAPK deletion mutant. Misexpression of *adv-1* was sufficient to fully  
47 suppress the phenotype of the  $\Delta pp-1$  mutant and partially suppress the phenotype of the  
48  $\Delta mak-1$  mutant. Collectively, our data demonstrate that the MAK-1-ADV-1 and MAK-2-  
49 PP-1 pathways form a tight regulatory network that maintains cell integrity and mediates  
50 communication and cell fusion.

51

## 52 **INTRODUCTION**

53 Cell-to-cell communication is a fundamental biological process across the tree of life.  
54 There is abundant work detailing mechanisms that mediate communication processes in  
55 diverse organisms, such as quorum sensing in bacteria, neurotransmission in mammals,  
56 or pheromone sensing in *Saccharomyces cerevisiae* (Perbal 2003; Merlini *et al.* 2013). All of  
57 these systems share a general mechanism of signal release and reception that subsequently  
58 initiates specific molecular responses that often lead to changes in transcription.

59  
60 Filamentous fungi, such as *Neurospora crassa*, depend on cell-to-cell communication to  
61 locate compatible cells and coordinate the process of cell fusion. *N. crassa* is a well-  
62 developed model for investigating mechanisms of cell-cell communication, chemotropic  
63 growth, and cell fusion at several points throughout the life cycle. During germination of  
64 genetically identical asexual spores, individual cells (germlings) collaborate to establish a  
65 new colony by engaging in cell-to-cell communication and chemotropic growth that  
66 ultimately results in cell fusion (Glass 2004; Fleissner *et al.* 2009; Richard *et al.* 2012;  
67 Leeder *et al.* 2013; Bastiaans *et al.* 2015). Germling fusion is an important aspect of colony  
68 establishment, and as a mature colony develops, hyphae within a colony also undergo  
69 chemotropic growth and fusion to further reinforce a robust hyphal network (Hickey *et al.*  
70 2002). Hyphal fusion also occurs between different colonies, which is important for  
71 mediating post-fusion self/non-self recognition mechanisms and heterokaryosis  
72 (Garnjobst and Wilson 1952; Saupe 2000; Glass and Kaneko 2003; Simonin *et al.* 2012).  
73 Cell-to-cell communication and fusion are also necessary for fertilization during the  
74 process of sexual reproduction. In filamentous ascomycete species, such as *N. crassa*, fertile  
75 hyphae (trichogynes) from protoperithecia chemotropically grow towards the male

76 gamete with the goal of cell fusion and the initiation of perithecium development,  
77 karyogamy, meiosis, and finally ascospore development (Kim and Borkovich 2004; Engh  
78 *et al.* 2010).

79

80 More than 60 genes have been identified as required for the process of germling  
81 communication and cell fusion (Fu *et al.* 2011; Read *et al.* 2012; Palma-Guerrero *et al.*  
82 2013; Dettmann *et al.* 2014; Fleißner and Herzog 2016). Strains carrying mutations in  
83 many of the genes involved in mediating germling or hyphal fusion show a pleiotropic  
84 vegetative and female sexual development phenotype. For example, in both *N. crassa* and  
85 *Sordaria macrospora*, most fusion mutants fail to develop female reproductive structures  
86 (protoperithecia) (Engh *et al.* 2010; Fu *et al.* 2011). Some of these genes are also essential  
87 for sexual reproduction, but many are not, indicating that asexual (germling and hyphal)  
88 cell fusion is mechanistically distinct from sexual (gamete) fusion. Among the >60 known  
89 genes, there are many encoding hypothetical proteins of unknown function, but also  
90 genes/proteins in characterized pathways, including two ERK-like Mitogen Activated  
91 Protein Kinase (MAPK) pathways and pathways involved in the production of reactive  
92 oxygen species (ROS), actin organization, and calcium signaling.

93

94 Two of the three predicted MAPK pathways in *N. crassa* are required for germling  
95 communication and cell fusion (Colot *et al.* 2006; Park *et al.* 2008). In general, MAPK  
96 pathways are intermediaries that transduce information from one part of the cell (i.e. a  
97 cell-surface sensor; input) to factors in the nucleus that alter gene transcription (output).  
98 The two MAPK pathways essential for communication and cell fusion are the MAK-2  
99 pathway, which is homologous to the pheromone response pathway in *S. cerevisiae*, and the

100 MAK-1 pathway, which is homologous to the cell wall integrity pathway in *S. cerevisiae*. In  
101 *N. crassa*, the core conserved components of the MAK-1 pathway are MIK-1  
102 (MAPKKK), MEK-1 (MAPKK), MAK-1 (MAPK), and SO, a scaffold important for  
103 some functions of the MAK-1 pathway (Teichert *et al.* 2014; Weichert *et al.* 2016). It is  
104 currently unknown which transcription factors are targets of the MAK-1 pathway,  
105 although transcription of several genes is dependent on MAK-1, and the rhythmic  
106 pattern of expression for a few MAK-1-dependent genes mirrors the rhythmic expression  
107 pattern of ADV-1-dependent genes (Bennett *et al.* 2013; Dekhang *et al.* 2017).  
108 Additionally, both *mak-1* and *adv-1* are targets of the circadian clock in *N. crassa* (Bennett *et*  
109 *al.* 2013; Dekhang *et al.* 2017). The core components of the conserved *N. crassa* MAK-2  
110 pathway are NRC-1 (MAPKKK), MEK-2 (MAPKK), MAK-2 (MAPK), and HAM-5, a  
111 scaffold protein important during cell fusion (Dettmann *et al.* 2014; Jonkers *et al.* 2014).  
112 PP-1 is the predicted downstream transcription factor target of MAK-2; a microarray  
113 expression study demonstrated that there is overlap between MAK-2-dependent and PP-  
114 1-dependent gene expression (Leeder *et al.* 2013). Several other studies have documented  
115 cross talk between the MAK-1 and MAK-2 pathways in *N. crassa* and in other filamentous  
116 ascomycete fungi, some of which is mediated by the STRIPAK complex (Maerz *et al.*  
117 2008; Maddi *et al.* 2012; Dettmann *et al.* 2012, 2013; Leeder *et al.* 2013; Fu *et al.* 2014).  
118  
119 Transcription is a common point of regulation for biological processes, and two  
120 conserved transcription factors in *N. crassa* (ADV-1 and PP-1) are essential for germling  
121 communication and fusion. Both the  $\Delta adv-1$  and  $\Delta pp-1$  deletion mutants have a  
122 pleiotropic phenotype and were initially identified as female-sterile mutants (Li 2005;  
123 Colot *et al.* 2006; Fu *et al.* 2011). PP-1 is a C2H2 zinc finger transcription factor that is

124 homologous to the *S. cerevisiae* pheromone response pathway transcription factor, *STE12*  
125 (Leeder *et al.* 2013). The core component of this pathway in *S. cerevisiae* is the Fus3p  
126 MAPK cascade, that once activated, leads to de-repression of Ste12p (Merlini *et al.* 2013).  
127 Ste12-like proteins, including PP-1, have two C2H2-Zn<sup>2+</sup> motifs and a homeobox-like  
128 STE domain involved in binding DNA (Errede and Ammerer 1989). In *N. crassa* the STE  
129 domain is essential for PP-1 function, but the C2H2-Zn<sup>2+</sup> motifs are dispensable (Leeder  
130 *et al.* 2013). Ste12-like transcription factors in fungi are regulated by direct  
131 phosphorylation and phosphorylation of associated regulatory proteins (Blackwell *et al.*  
132 2007). Several phosphorylation sites have been identified on PP-1 in *N. crassa*, but the  
133 biological significance of these sites remains unknown (Leeder *et al.* 2013; Xiong *et al.*  
134 2014; Jonkers *et al.* 2014).

135

136 ADV-1 is a Zn(II)<sub>2</sub>Cys<sub>6</sub> transcription factor that, like PP-1, regulates growth, and asexual  
137 and sexual development. ADV-1 is not as broadly conserved as PP-1, and clear *adv-1*  
138 homologs are restricted to the filamentous Ascomycete species (Pezizomycotina). In the  
139 self-fertile (homothallic) species *S. macrospora*, the *adv-1*-ortholog, *pro1*, is required for  
140 protoperithecial development, while heterothallic *N. crassa* does not require *adv-1* for  
141 protoperithecia development (Masloff *et al.* 1999). In *N. crassa*, *adv-1* is essential for post-  
142 mating perithecial development, asexual cell fusion, and wild-type-like growth rate. Both  
143 ADV-1 and Pro1 have a GAL4-like DNA-binding domain and a transcription-activation  
144 domain. In contrast to the *S. cerevisiae* protein GAL4p, Pro1 lacks a coiled-coil  
145 dimerization domain, indicating that Pro1 (and ADV-1) likely function independently  
146 (Masloff *et al.* 2002). Unlike PP-1, upstream factors that influence ADV-1 regulated  
147 transcription are largely unknown, with the exception of a ChIPseq experiment that

148 identified *adv-1* as a target of the circadian clock master regulator, the White Collar  
149 Complex (Smith *et al.* 2010). ADV-1 is essential for developmental oscillations (i.e.  
150 conidiation) and the quantity of *adv-1* mRNA and ADV-1 protein oscillates with the clock  
151 (Smith *et al.* 2010). Furthermore, the expression of ADV-1 target genes in a mature  
152 colony matches the rhythm of other clock-controlled genes. These data led to the  
153 hypothesis that hyphal fusion is a clock-regulated developmental process (Dekhang *et al.*  
154 2017).

155

156 The  $\Delta adv-1$  and  $\Delta pp-1$  mutants share many phenotypes across filamentous fungi, yet the  
157 relationship between these two transcription factors remains unclear. Independent  
158 expression profiling studies investigating ADV-1 or PP-1-dependent transcription indicate  
159 that at least some genes require ADV-1 and PP-1 for wild type levels of expression (Li  
160 2005; Nowrousian *et al.* 2007; Leeder *et al.* 2013; Dekhang *et al.* 2017). Here, we  
161 compared expression profiles using RNAseq on  $\Delta adv-1$  and  $\Delta pp-1$  germlings relative to  
162 expression patterns in wild-type germlings. To identify genes that were regulated and  
163 bound by ADV-1 or PP-1, we developed an *in vitro* method for identifying transcription  
164 factor binding sites in *N. crassa* and other fungi called DNA Affinity Purification  
165 sequencing (DAP-seq). DAP-seq is similar to ChIPseq, except that *in vitro* synthesized  
166 transcription factors are incubated with native genomic DNA. DNA fragments bound by  
167 the transcription factor are then identified by high throughput sequencing methods.  
168 DAP-seq has been used in a global analysis of transcription factor binding sites in  
169 *Arabidopsis thaliana* (O'Malley *et al.* 2016). Our data showed that PP-1 directly regulates  
170 *adv-1*; ADV-1 is the primary regulator of many genes that are important for asexual



171 growth, cell fusion and development. To investigate the linkage between *mak-1*, *mak-2*,  
172 *adv-1*, and *pp-1*, we used misexpression and phenotypic analyses. Our data showed that  
173 *mak-1* primarily functions upstream of *adv-1*, and *mak-2* primarily functions upstream of  
174 *pp-1*. However, the MAK-1/ADV-1 pathway and the MAK-2/PP-1 pathway engage in  
175 crosstalk and both pathways form a regulatory network that mediates growth,  
176 communication, fusion, and the response to cell wall stress.

177

## 178 **MATERIALS & METHODS**

### 179 RNA isolation

180 Strains used: FGSC 2489 (wild-type), FGSC 11042 ( $\Delta*adv-1*$ ) and  $\Delta*pp-1*$  (Leeder *et al.*  
181 2013). Each strain was initially grown on Vogel's Minimal Medium (VMM) (Vogel 1956)  
182 agar slant tubes for 5 days. Conidia harvested, filtered through cheesecloth, and then  
183 inoculated into 100mL of liquid VMM in a 250mL flask to a final concentration of  
184  $10^6$ conidia/mL. Flasks were incubated at 30°C in constant light for 2.5 hours shaking at  
185 220 rpm to induce germination, followed by 2.5 hours stationary incubation to allow  
186 communication to occur.  $\Delta*pp-1*$  conidia have slightly delayed germination, thus these  
187 conidia were shaken for 3 hours, followed by 2.5 hours stationary incubation. Germlings  
188 were harvested by vacuum filtration over nitrocellulose paper and transferred to a 2mL  
189 screw cap tube that was immediately frozen with liquid N<sub>2</sub>. Experimental design for each  
190 strain: conidia from one VMM slant tube was used to inoculate 8 flasks of liquid VMM,  
191 then two flasks were pooled during germling harvest, resulting in a total of 4 samples per  
192 strain. RNA was extracted using a previously described TRIzol-based method (Leeder *et*  
193 *al.* 2013). RNA quality and concentration were quantified via Bioanalyzer at the qb3

194 facility at UC Berkeley. Three samples per strain with the highest quality and  
195 concentration of RNA were submitted for library prep and sequencing on an Illumina  
196 HiSeq3000 at the UC Davis DNA Technologies Core.

197

#### 198 RNAseq data analysis and visualization

199 Fast-X Toolkit ([http://hannonlab.cshl.edu/fastx\\_toolkit/index.html](http://hannonlab.cshl.edu/fastx_toolkit/index.html)) was used to filter  
200 out low quality raw reads (~11-12% of all reads) and Tophat (Langmead *et al.* 2009)  
201 mapped high quality reads to the *N. crassa* transcriptome version 12  
202 ([ftp://ftp.broadinstitute.org/pub/annotation/fungi/neurospora\\_crassa/assembly/NC12](ftp://ftp.broadinstitute.org/pub/annotation/fungi/neurospora_crassa/assembly/NC12))  
203 Differential expression was calculated using three independent methods: Cuffdiff (Roberts  
204 *et al.* 2010), DESeq2 (Love *et al.* 2014), and EdgeR (Robinson *et al.* 2010; McCarthy *et al.*  
205 2012). We defined the threshold for significant differential expression to be  $-2 <$   
206  $\log_2\text{FoldChange} < 2$  and  $p.\text{adj} < 0.01$ . RNAseq raw data (.fastq) is available at the NCBI  
207 Sequence Read Archive with accession number SRP133239.

208

209 We used the Circos data visualization tool (Krzywinski *et al.* 2009) to generate Figure 2.  
210 Genes are grouped according to known function or predicted function based on  
211 homology (BLASTp, FungiDB, or the Broad Institute's Fungal Orthogroups Repository  
212 v1.1). Highlighted gene ID's indicate genes that have an ADV-1 binding site or a PP-1  
213 binding site 2kb upstream from the start codon. PP-1 binding sites were identified solely  
214 via DAP-seq, whereas ADV-1 binding sites are the consensus between DAP-seq data and  
215 a previously published ChIPseq dataset (Dekhang *et al.* 2017).

216

#### 217 Genomic DNA Library Preparation

218 DAP-seq was originally developed for *A. thaliana* (O'Malley *et al.* 2016). Here we adapted  
219 the protocol in O'Malley *et al* for use with *N. crassa*. FGSC 2489 was grown in liquid  
220 VMM for 24 hours at 25°C and shaking at 220rpm. Mycelia were harvested using  
221 vacuum filtration over Whatman #1 filter papers, and transferred into 2ml tubes for flash  
222 freezing in liquid N<sub>2</sub>. Cells were ruptured by bead beating for 1 minute with 1mm silica  
223 beads and DNA lysis buffer (0.05M NaOH, 1mM EDTA, 1% TritonX) was added to  
224 each sample tube. DNA was purified using DNeasy Blood & Tissue kit (Qiagen Inc.), and  
225 sheared to 300bp peak using Covaris LE220 sonicator. AMPure XP beads were used to  
226 remove DNA above and below target molecular weight. Initially, sheared DNA was  
227 mixed in with AMPure XP beads (in PEG-8000) at a ratio of 100:60. At this ratio, beads  
228 bind DNA with molecular weight above 700bp. Supernatant from this primary binding  
229 was taken and added to new beads where final ratio of DNA solution to PEG-8000 was at  
230 100:90. At this ratio, DNA below ~300bp do not bind to AMPure XP beads, and  
231 remaining DNA was be eluted for library preparation. KAPA library kit for illumina  
232 sequencing was used to prepare final libraries and stored at -20°C for later use.

233

234 Transcription factor cloning, transcription, translation and DNA Affinity Purification

235 (DAP)

236 TF open reading frames (ORF) were amplified from cDNA using RNA to cDNA ecodry  
237 premix (Clontech). Amplified TFs sequences were inserted into pIX *in vitro* expression  
238 vector modified to contain an N-terminal HALO-Tag (O'Malley *et al.* 2016). Vector  
239 backbone was amplified and assembled with TF ORFs using Gibson assembly and then  
240 transformed into competent *E. coli* cells for storage and production.

241

242 In vitro transcription and translation of TFs was achieved by using Promega TnT T7  
243 Rabbit Reticulocyte Quick Coupled Transcription/Translation System. 1 $\mu$ g of plasmid  
244 DNA, 60 $\mu$ l of TnT Master Mix, and 1.5 $\mu$ l of 1mM methionine were combined and  
245 incubated overnight at room temperature. Expression was verified using Western blot  
246 analysis with Promega HaloTag monoclonal antibody. Completed TnT reactions were  
247 incubated with 20ng of genomic DNA library, 1 $\mu$ g salmon sperm for blocking, and 20 $\mu$ l  
248 Promega Magne HaloTag Beads on a rotator for 1 hour at room temperature. Bead  
249 bound proteins and protein bound DNA were washed three times with 2.5% Tween20 in  
250 PBS. HaloTag beads were resuspended in 30 $\mu$ l ddH<sub>2</sub>O and heated to 98°C for 10  
251 minutes to denature protein and release DNA fragments into solution. Supernatant was  
252 transferred to a new tube for PCR amplification. DNA was amplified for final libraries  
253 using KAPA Hifi polymerase for 12-16 cycles of PCR.

254

#### 255 DAP-seq data analysis

256 Filtered reads were mapped against *N. crassa* OR74A genome (v12) using bowtie2 v2.3.2  
257 (Kim *et al.* 2013). SamTools (Li *et al.* 2009) was used to convert .sam to .bam files and to  
258 create .bai index files for viewing reads on IGV (Integrated Genomics Viewer). MACS2  
259 (Zhang *et al.* 2008) with p-value cutoff at 0.001 was used for calling peaks. A negative  
260 control data set consisting of DAP pull-down with Promega TnT master mix with no  
261 plasmid added, salmon sperm, and genomic DNA was also input into MACS2 as the  
262 control condition. We repeated the ADV-1 DAP-seq once and pooled the results of both  
263 DAP-seq runs. DAP-seq data is available at the NCBI Sequence Read Archive with  
264 accession number SRP133627.

265

### 266 Motif construction

267 To construct biologically meaningful transcription factor DNA binding motifs, we used  
268 DAP-seq peaks associated with differentially expressed genes according to corresponding  
269 RNAseq data. Sequences of these true positive peaks were collected using a custom  
270 python script that reads in genomic position of each peak from the MACS2 output file,  
271 and ascertains the sequence from *N. crassa* OR74A Broad v12 genome FASTA file. The  
272 script output is a FASTA file with sequences from all true positive peaks. Output FASTA  
273 files were input into MEME or DREME v4.12.0 with flags maxw =20, minsites = 5,  
274 nmotifs = 8, denoting max width of motif, minimum number of sites for each motif and  
275 number of motifs to generate respectively. For ADV-1 specifically, we used set of 41 DAP  
276 binding peak sequences. These peaks were within the promoter regions of from genes that  
277 fit two parameters: within 1kbp upstream of the ATG start site according to DAP-seq, as  
278 well as 4 fold down-regulated in the  $\Delta adv-1$  mutant as compared to wild-type. Nucleotide  
279 sequences for these 41 peaks were fed into MEME v4.12.0 to build the ADV-1 binding  
280 motif. For PP-1, we loosened the parameters slightly to 2 fold down-regulated in *App-1* as  
281 compared to wild-type, due to the small number of genes both directly bound according  
282 to DAP-seq and differentially expressed at a 4 fold level. Nucleotide sequences for 22  
283 peaks were fed into MEME v4.12.0 to build the PP-1 binding motif.

284

### 285 qRT-PCR

286 Germlings were prepared and RNA extracted as described for RNAseq samples. qRT-  
287 PCR reactions were prepared following the manufacturer protocols for the Bioline  
288 SensiFast™ SYBR® no-ROX One-Step kit and Bio-Rad CFX Connect™ Real-Time

289 PCR Detection System. Each sample was replicated at least 4 times within a 96-well-plate  
290 and total reaction volume was 20 $\mu$ L. Expression data was normalized to both actin and  
291 wild-type following the  $2^{-\Delta\Delta C_t}$  method (Livak and Schmittgen 2001).

292

### 293 Strain construction

294 Misexpression strains were made by transforming the *his-3*-targeted vectors described  
295 below into *his-3* deletion strains as previously described (Colot *et al.* 2006). Positive  
296 transformants were selected for histidine prototrophy and hygromycin resistance. To  
297 avoid any off-target effects that may have resulted from the transformation process, we  
298 backcrossed each transformant to *his-3* (FGSC 9716 or FGSC 6103). Transformants that  
299 were incapable of going through a cross were purified via microconidial isolation (Pandit  
300 and Maheshwari 1994). All genotypes were confirmed via PCR.

301

302 The *Ptef1-adv-1-v5 his-3* vector was constructed by amplifying *adv-1* from genomic DNA  
303 with primers that omitted the native STOP codon and added *XbaI* and *PacI* cut sites on  
304 either end of the *adv-1* ORF. PCR products were gel purified and blunt ligated into  
305 pCR®-Blunt. The *adv-1* sequence was ligated into an in-house vector containing V5  
306 using *XbaI* and *PacI* sites. *adv-1-v5* was amplified using a reverse primer that added a  
307 TGA stop codon at the end of the V5 sequence, in addition to *EcoRI* and *ApaI* cut sites.  
308 This PCR product was gel purified and blunt ligated into pCR®-Blunt, digested and  
309 ligated into an in-house vector based on pMF272 (Freitag *et al.* 2004) containing the *tef-1*  
310 promoter (*Ptef1*) using *XbaI* and *ApaI* cut sites. The *Ptef1-pp-1-v5* vector was constructed by  
311 amplifying *pp-1* from the *Pccg1-pp-1-gfp his-3* vector (Leeder *et al.* 2013) with primers that

312 added *Bam*HI and *Pac*I sites. This PCR product was ligated into pCR®-Blunt, digested  
313 and ligated into the *Ptef1-adv1-V5 his3* vector using *Bam*HI and *Pac*I cut sites, which  
314 resulted in replacement of the *adv-1* sequence with *pp-1* coding sequences. The sequence  
315 of *Ptef1-adv1-v5* and *Ptef1-pp-1-v5* in the *his-3* vectors was confirmed via Sanger  
316 sequencing prior to transforming into *his3*<sup>-</sup> deletion strains.

317

### 318 Growth, fusion, mating, and cell wall stress assays

319 Standard *N. crassa* growth conditions, media, and protocols are available at  
320 <http://www.fgsc.net/Neurospora/NeurosporaProtocolGuide.htm>. For assays to quantify  
321 aerial hyphae height, growth rate, and germling communication, conidia were grown up  
322 and harvested as described for RNAseq. Conidial suspensions were diluted to specified  
323 concentrations and immediately used for phenotyping assays. Aerial hyphae were grown  
324 up from 10<sup>6</sup> conidia in 1mL of liquid VMM, incubated at 30°C in the dark for 72 hrs  
325 (n=6). Growth rate was measured by inoculating 100µL of 10<sup>6</sup>conidia/mL onto one end  
326 of a glass race tube containing 25mL of VMM 1.5% agar. Linear growth in race tubes  
327 was measured every 24 hrs for at least 4 days (n=3). Germling communication assays  
328 consisted of spreading 300µL of 10<sup>7</sup>conidia/mL on a 9 cm VMM 1.5% agar plate. Plates  
329 were incubated at 30°C in the dark for 3.5hours. To visualize germlings, agar squares  
330 (~1cm<sup>2</sup>) were excised and observed with a Zeiss Axioskop 2 equipped with a Q Imaging  
331 Retiga-2000R camera (Surrey) using a 40x/1.30 Plan-Neofluar oil immersion objective  
332 and the iVision Mac4.5 software (Heller *et al.* 2016). Germling communication frequency  
333 was determined with the ImageJ Cell Counter tool (<http://imagej.nih.gov/ij/>). For  
334 mating assays, female strains were inoculated onto Synthetic Cross (SC) agar 5.4cm plates

335 (Westergaard and Mitchell 1947). These plates were incubated at 30°C in the dark for  
336 two days, and then moved to 25°C and light for an additional 5 days to allow for full  
337 production of protoperithecia. Male strains were grown up on VMM as described above.  
338 Mating was initiated by inoculating female plates with 150µL of un-diluted conidial  
339 suspension of male strains of the opposite mating type. Cell wall stress assays were  
340 conducted on large petri plates containing 45mL of VMM with 1.5% agar and 2% FGS.  
341 The following cell wall stress drugs were added and mixed to VMM+FGS immediately  
342 prior to pouring each plate (one drug/plate): 1.3µg/mL Caspofungin, 1.5mg/mL  
343 Calcofluor White, and 1mg/mL Congo Red. Conidia for cell wall stress tests were grown  
344 up and harvested as described above, then diluted to 10<sup>6</sup>spores/mL. A 1:5 dilution series  
345 was prepared starting with 10<sup>6</sup>spore/mL as the most concentrated dilution. Conidial  
346 solutions were then spotted onto freshly poured plates at 5µL/spot.

347

## 348 **RESULTS**

### 349 ADV-1 and PP-1 have a shared regulon in germlings

350 To investigate the how ADV-1 ([NCU07392](#)) and PP-1 ([NCU00340](#)) regulate germling  
351 communication and fusion, we compared expression profiles of  $\Delta adv-1$ ,  $\Delta pp-1$ , and wild-  
352 type germlings. We extracted RNA from germlings 2.5 hours after germination, which is  
353 when the majority of wild-type germlings were actively engaging in chemotropic growth  
354 and cell fusion (Figure 1A). Our RNAseq data confirm previous studies that implicated  
355 PP-1 and ADV-1 as transcriptional activators (Masloff *et al.* 2002; Leeder *et al.* 2013).  
356 Figure 1B illustrates that the vast majority of differentially expressed genes were down  
357 regulated in  $\Delta adv-1$  and  $\Delta pp-1$  mutants compared to wild-type germlings (Figure 1B). We



358 defined significant differential expression in each mutant compared to wild-type as -  
359  $2 > \log_2 \text{FoldChange} > 2$ , adjusted p-value  $< 0.01$ , and consensus among three different  
360 programs that calculate differential expression; DESeq2, EdgeR, and Cuffdiff (Files S1  
361 and S2).

362

363 We did not identify any significantly up regulated genes in the  $\Delta adv-1$  mutant as  
364 compared to wild-type germlings; 17 genes were up regulated in  $\Delta pp-1$  cells as compared  
365 to wild-type germlings (File S1). The *a*-pheromone precursor gene, *mfa-1*, was the most  
366 highly expressed gene in  $\Delta pp-1$  (*mat a*) germlings (File S1); it is a clear outlier in the top  
367 right corner of Figure 1B. These data complement a previous study that used qRT-PCR  
368 to show that both *ccg-4* (*A*-pheromone precursor) and *mfa-1* are substantially over-  
369 expressed in  $\Delta pp-1$  cells as compared to wild-type (Leeder *et al.* 2013), indicating that PP-1  
370 specifically represses expression of the mating pheromones in germlings.

371

372 Analyses of RNAseq data identified 155 significantly down regulated genes in either  $\Delta adv-$   
373 *1* or  $\Delta pp-1$  as compared to wild-type germlings (Figure 2 and File S2). There was  
374 substantial overlap between the down regulated genes in both mutants (Figure 1C). Of  
375 the down regulated genes in  $\Delta pp-1$  germlings, 75% (87/116) were also down regulated in  
376  $\Delta adv-1$  cells, while 69% (87/126) of the genes down regulated in  $\Delta adv-1$  germlings were  
377 also down regulated in  $\Delta pp-1$  cells. Before imposing a threshold of significant differential  
378 expression, we first calculated the distance between samples on our entire RNAseq  
379 dataset. These data further demonstrated that gene expression was more similar between  
380  $\Delta adv-1$  and  $\Delta pp-1$  germlings than either mutant compared to wild-type germlings (Figure

381 S1). We also did not observe any pattern in the genomic location of genes that are  
382 regulated by ADV-1 and/or PP-1 (Figure S2).  
383  
384 In an independent study, expression patterns in the hyphal stage of the  $\Delta adv-1$  mutant  
385 were compared to those in wild-type hyphae, at three different circadian time points  
386 (Dekhang *et al.* 2017). We compared this  $\Delta adv-1$  hyphal dataset with our  $\Delta adv-1$  germling  
387 dataset ( $-2 < \log_2 \text{FoldChange} < 2$ , adjusted p-value  $< 0.01$ , Cuffdiff); all genes differentially  
388 expressed during at least one time point were included. We found only a modest overlap  
389 (26.5%, 39/147) between our  $\Delta adv-1$  germling dataset and the  $\Delta adv-1$  hyphal dataset  
390 (Figure 1D). Of the 39 genes regulated by ADV-1 in both hyphae and germlings (Table  
391 S1), 22 are either predicted or known to be involved in the processes of communication,  
392 cell fusion, development, or metabolism including *ham-6*, *ham-8*, *ham-11*, *doc-2*, *lfd-1*, *prm-*  
393 *1*, *mat A-1*, and *esd-C* (Glass *et al.* 1988; Han *et al.* 2008; Fleissner *et al.* 2008; Fu *et al.* 2011;  
394 Leeder *et al.* 2013; Palma-Guerrero *et al.* 2014; Heller *et al.* 2016). The remaining 19 genes  
395 encode hypothetical proteins. Although the overlap between  $\Delta adv-1$  RNAseq datasets can  
396 be explained by the fact that chemotropic growth and fusion occur during both germling  
397 and hyphal stages, there are additional developmental and morphological differences  
398 between germlings and hyphae that could explain reduced overlap between the germling  
399 and hyphal  $\Delta adv-1$  datasets. Consistent with this hypothesis was the observation that our  
400  $\Delta pp-1$  germling dataset overlapped with data from a previous single RNAseq experiment  
401 on  $\Delta pp-1$  germlings (Leeder *et al.* 2013).  
402  
403 Identification of ADV-1 and PP-1 binding sites by DAP-seq

404 DNA-Affinity Purification sequencing (DAP-seq) was recently developed as a high-  
405 throughput *in vitro* method for identifying transcription factor binding sites using genomic  
406 DNA (O'Malley *et al.* 2016). We adapted this method for *N. crassa*. Briefly, we amplified  
407 the *adv-1* and *pp-1* ORFs from cDNA and added a N-terminal HALO-tag to each gene  
408 (see Materials and Methods). The HALO-ADV-1 and HALO-PP-1 *in vitro*-synthesized  
409 proteins were used for immunoprecipitation experiments using sheared *N. crassa* gDNA  
410 that contained adaptors for sequencing. From DAP-seq, we identified PP-1 binding sites  
411 that were significantly enriched 2kb upstream of the predicted ATG translation start site  
412 for 1953 genes, and ADV-1 binding sites that were significantly enriched within 2kb  
413 upstream of the ATG site for 2059 genes ( $p < 0.0001$ , MACS2)(Figure 3A, File S3).

414

415 All *in vitro* assays, such as DAP-seq, contain false positives and false negatives because  
416 biologically relevant factors are excluded from the assay. For example, a false negative  
417 could arise if a transcription factor requires a co-factor to bind a particular sequence of  
418 DNA. A false positive could occur if a factor normally blocks a transcription factor from  
419 binding a particular DNA sequence. It is also impossible to know from DAP-seq how  
420 environmental or biological conditions affect transcription factor binding. In contrast, *in*  
421 *vivo* methods such as ChIPseq provide a snapshot of where a transcription factor binds  
422 under the precise environmental and biological conditions of the assay. Comparing data  
423 from both DAP-seq and ChIPseq experiments eliminates some of the error associated  
424 with each assay. Additional comparison with expression datasets such as RNAseq can  
425 elucidate true-positive peaks associated with genes that are directly bound and regulated  
426 by a transcription factor.

427

428 Of the 2059 genes bound by ADV-1 identified with DAP-seq, 273 genes were in  
429 consensus with a previous ADV-1 ChIPseq dataset (Dekhang *et al.* 2017). Furthermore,  
430 44 of these 273 genes were differentially expressed in  $\Delta adv-1$  germlings versus wild type  
431 germlings (Figure 2A). The ADV-1 germling regulon (126 genes)(Figure 2) was enriched  
432 for ADV-1 binding sites (consensus between ChIPseq and DAP-seq datasets) as compared  
433 to ADV-1 binding sites across the entire genome; 35% of the ADV-1 regulon versus 21%  
434 of the genome ( $p=0.0004$ , Fisher's Exact Test). Of the 1953 genes bound by PP-1, only  
435 33 genes are differentially expressed in  $\Delta pp-1$  vs. wild-type germlings. These 33 genes  
436 bound by PP-1 represented 28% of the PP-1 germling regulon (Figure 2), which is what  
437 we would expect by chance as compared to the 20% of the entire genome  
438 bound by PP-1 ( $p=0.02$ , Fisher's Exact Test).

439

440 To construct biologically meaningful transcription factor DNA binding motifs, we  
441 analyzed only the strongest DAP-seq peaks that were within a 2kb region upstream of  
442 differentially expressed genes. These true-positive peaks were enriched for consensus  
443 binding motifs (Figure 3B). The ADV-1 binding motif mirrored previously reported  
444 ADV-1 binding motifs (Weirauch *et al.* 2014; Dekhang *et al.* 2017). In contrast, our PP-1  
445 motif differed from the PP-1 motif identified using peptide binding arrays (Weirauch *et al.*  
446 2014).

447

448 PP-1 and ADV-1 regulate genes required for communication, fusion, growth, and  
449 development

450 The  $\Delta adv-1$  and  $\Delta pp-1$  mutants are impaired in several morphological processes including  
451 conidial germination, germling communication, growth rate, aerial hyphae extension,  
452 female sexual development, and ascospore germination (Fu *et al.* 2011; Leeder *et al.* 2013;  
453 Dekhang *et al.* 2017) (Figure 4, Figure S3, and Table S2). The pleiotropic nature of  $\Delta pp-1$   
454 and  $\Delta adv-1$  mutants was reflected in the broad functional diversity of the 155 genes that  
455 were positively regulated by ADV-1 and/or PP-1 (Figure 2, File S2). These 155 genes fell  
456 into three major groups: basic cellular processes (44 genes), communication/fusion/non-  
457 self recognition (49 genes), and hypothetical proteins (62 genes). ADV-1 and PP-1  
458 regulate at least some genes in each group, and no group was uniquely regulated by one  
459 transcription factor (Figure 2). The significant reduction in growth rate and aerial hyphae  
460 in  $\Delta adv-1$  and  $\Delta pp-1$  cells (Figure 4B,C) can be at least partially explained by the 44 genes  
461 whose function was implicated in basic cellular processes such as metabolism, nutrition,  
462 growth, development, and general stress response (Figure 2, File S2). Of particular  
463 interest to this study are the 49 genes involved in the process of communication,  
464 adhesion, fusion, and non-self recognition (Figure 2, File S2). Twenty-two of these 49  
465 genes have been reported previously as being required for normal germling  
466 communication, cell fusion, or non-self recognition via heterokaryon incompatibility  
467 (Kaneko *et al.* 2006; Kim and Borkovich 2006; Fleissner *et al.* 2008; Fu *et al.* 2011; Leeder  
468 *et al.* 2013; Palma-Guerrero *et al.* 2014; Hernández-Galván *et al.* 2015; Lalucque *et al.*  
469 2016; Heller *et al.* 2016, 2018). The remaining 27 genes either have predicted protein  
470 domains or homology with proteins implicated in the processes of signaling, adhesion,  
471 fusion, cell wall remodeling, or heterokaryon incompatibility.

472

473 We assessed the germling fusion phenotype for each differentially expressed gene that had  
474 an available deletion mutant and that had not previously been described (110 deletion  
475 mutants available, 23 mutants not available or heterokaryotic, and 22 mutants  
476 previously described). Qualitatively, 106 of these mutants had a wild-type-like germling  
477 fusion phenotype. However, four mutants ( $\Delta$ NCU04645,  $\Delta$ NCU05836,  $\Delta$ NCU05916,  
478 and  $\Delta$ NCU04487) had obviously reduced levels of germling fusion. We therefore  
479 confirmed that the germling fusion phenotype was due to the deleted gene by co-  
480 segregation analysis (data not shown), and we quantified the frequency of germling fusion  
481 in each strain (Figure 5A). All four mutants have a significantly reduced frequency of  
482 germling fusion compared to the wild-type parental strain ( $p < 0.01$ ,  
483 ANOVA+TukeyHSD,  $n=3$ , ~200-400 germling pairs per sample).  $\Delta$ NCU04645 was the  
484 only mutant that completely lacked any germling communication or fusion. Similarly,  
485  $\Delta$ NCU04645 was also the only mutant with significantly reduced height of aerial hyphae  
486 (Figure 5B, ANOVA+TukeyHSD,  $p < 0.0001$ ,  $n=6$ )(Figure 5B, S4) and growth rate  
487 compared to the wild-type parental strain (Figure 5C, ANOVA+TukeyHSD,  $p < 0.01$ ,  
488  $n=2$ )(Figure 5C). [NCU05836](#) is predicted to be an ER mannosidase and [NCU05916](#) is a  
489 predicted alpha-1,3-mannosyltransferase with homology to the Cu-responsive virulence  
490 protein CMT1 in *Cryptococcus neoformans* (Ding *et al.* 2013). Both [NCU04487](#) and  
491 [NCU04645](#) are uncharacterized hypothetical proteins. The [NCU04487](#) protein sequence  
492 has one predicted C-terminal transmembrane domain and no characterized orthologs.  
493 The [NCU04645](#) protein sequence contains a predicted C-terminal AIM24 domain (E-  
494 value=1.9E-51, pfam). The AIM24 domain is named after the *S. cerevisiae* protein  
495 Aim24p, which is a non-essential mitochondrial inner-membrane protein. In *S. cerevisiae*,

496 *Δaim24* mutant shows decreased growth, and Aim24p coordinates the assembly of the  
497 MICOS (mitochondrial contact site and cristae organizing system) protein complex  
498 (Harner *et al.* 2014).  
499  
500 Misexpression of *adv-1* suppresses the pleiotropic phenotype of the *Δpp-1* mutant  
501 There are four lines of evidence indicating that PP-1 activates transcription of *adv-1*, with  
502 ADV-1 as the primary regulator of the PP-1/ADV-1 regulon. First, *adv-1* is down  
503 regulated in the *Δpp-1* mutant, but the inverse is not true. Second, our list of 155 ADV-  
504 1/PP-1 regulated genes is significantly enriched for ADV-1 binding sites (p=0.0004,  
505 Fisher's Exact Test), whereas the same is not true for PP-1 binding sites (p=0.02 Fisher's  
506 Exact Test). Third, co-regulated genes are more strongly down regulated in the *Δadv-1*  
507 mutant than the *Δpp-1* mutant (Figure 2, File S2). Fourth, there are no potential ADV-1  
508 binding motifs upstream of *pp-1*, but there are several potential PP-1 binding motifs  
509 upstream of *adv-1*, despite the fact that DAP-seq did not identify PP-1 bound to the *adv-1*  
510 promoter. These observations led to the hypothesis that PP-1 regulates *adv-1* and ADV-1  
511 directly regulates downstream gene expression.  
512  
513 To test this hypothesis, we made epitope-tagged misexpression (ME) constructs (*Ptef1-adv-*  
514 *1-v5* and *Ptef1-pp-1-v5*) and transformed them into *Δpp-1* and *Δadv-1* cells. Successful  
515 misexpression in each mutant was verified by qRT-PCR (Figure 4A). As predicted,  
516 expression of *adv-1* was restored in *Δpp-1(Ptef1-pp-1-v5)* germlings as compared to the *Δpp-*  
517 *1* mutant itself (p=1.8e<sup>-7</sup>, Welch's t-test, n=8). In contrast, expression levels of *pp-1* were  
518 equivalent between *Δadv-1(Ptef1-adv-1-v5)* and *Δadv-1* germlings (p=0.0045, Welch's t-

519 test, n=4) (Figure 4A). Both the  $\Delta adv-1$  mutant and the  $\Delta pp-1$  mutant have a pleiotropic  
520 phenotype when compared with wild-type cells (Figure 4, Figure S3, Table S2). The  
521 introduction of *Ptef1-adv-1-v5* fully complemented the pleiotropic phenotype of both  $\Delta adv-$   
522 *1* and  $\Delta pp-1$  mutants, while the introduction of *Ptef1-pp-1-v5* only complemented the  
523 phenotype of the  $\Delta pp-1$  mutant, but not the  $\Delta adv-1$  mutant (Figure 4 and Figure S3).  
524 Collectively, these misexpression experiments support the RNAseq data and the  
525 hypothesis that PP-1 controls expression of *adv-1*; ADV-1 is the primary transcriptional  
526 regulator of genes involved in cell communication, fusion, protoperithelial development,  
527 and growth.

528

#### 529 PP-1 binds the promoter of *adv-1*

530 Given that PP-1 was required for expression of *adv-1*, and misexpression of *adv-1* was  
531 sufficient to suppress the phenotype of  $\Delta pp-1$  cells, we were surprised that our DAP-seq  
532 data failed to identify PP-1 binding to the promoter of *adv-1*. We used the consensus DNA  
533 binding motif for each transcription factor (Figure 3B) to search for potential binding sites  
534 2kb upstream of both *adv-1* and *pp-1*. Potential ADV-1 binding sites were not identified in  
535 the promoter region of either *adv-1* or *pp-1*, however several potential PP-1 binding sites  
536 were identified within 2kb of the *adv-1* ORF (Figure 6A). Using antibodies to V5 or GFP,  
537 PP-1-bound chromatin was immunoprecipitated from  $\Delta pp-1$  (*Ptef1-pp-1-v5*) and  $\Delta pp-$   
538 *1* (*Pccg1-pp-1-gfp*) germlings. Ten different primer sets in the *adv-1* promoter region were  
539 used to interrogate this pool of PP-1-bound DNA. One primer set successfully amplified a  
540 region of DNA ~500bp upstream of the *adv-1* ORF (Figure 6B & Figure S5). This  
541 immunoprecipitated and amplified region is 127bp long and contains two potential PP-1



542 binding sites (Figure 6C). These data confirm our hypothesis that PP-1 binds the  
543 promoter and regulates expression of *adv-1*.

544

#### 545 Misexpression of *adv-1* rescues growth defects of $\Delta mak-1$ , but not $\Delta mak-2$ mutants

546 We reasoned that since misexpression (ME) of *adv-1* complemented the phenotype of  $\Delta pp-$   
547 *1*, then *MEadv-1* or *MEpp-1* might also complement the phenotype of MAPK mutants  
548 predicted to function upstream of these transcription factors. Previous data indicates that  
549 the MAK-1 and MAK-2 MAPK pathways engage in crosstalk and likely function  
550 upstream of both PP-1 and ADV-1 (Maerz *et al.* 2008; Maddi *et al.* 2012; Dettmann *et al.*  
551 2012; Leeder *et al.* 2013; Fu *et al.* 2014). In an effort to elucidate this MAPK-transcription  
552 factor network, we misexpressed *adv-1* or *pp-1* in the terminal MAPK mutant ( $\Delta mak-1$  and  
553  $\Delta mak-2$ ) for each MAPK pathway; misexpression was confirmed by qRT-PCR (Figure  
554 7A).

555

556 Expression of *adv-1* was effectively zero in  $\Delta mak-1$  and  $\Delta mak-2$  germlings as compared to  
557 wild-type germlings ( $p=3.9e^{-19}$  and  $p=1.4e^{-23}$  respectively, Welch's t-test,  $n=8$ ), while  
558 expression of *pp-1* was reduced only in  $\Delta mak-2$  cells ( $p=1.15e^{-9}$ , Welch's t-test,  $n=8$ )  
559 (Figure 7A). These data indicate that MAK-2 functions upstream of both *pp-1* and *adv-1*,  
560 while MAK-1 functions upstream of *adv-1* independently of *pp-1*. To test the effect of  
561 misexpressing *pp-1* in  $\Delta mak-2$  cells, we used a  $\Delta mak-2(Pccg1-pp-1-gfp)$  strain; attempts to  
562 obtain  $\Delta mak-2(Ptef1-pp-1-v5)$  transformants were unsuccessful. The expression of *Pccg1-pp-*  
563 *1-gfp* complemented the germling communication, cell fusion, aerial hyphae, and growth  
564 rate phenotype of  $\Delta pp-1$  cells, but not the sexual defects of the  $\Delta pp-1$  mutant (Figure

565 S3)(Leeder *et al.* 2013). In contrast to the restoration of *adv-1* expression in  $\Delta pp-1(Ptef1-pp-$   
566  $1-v5)$  germlings, neither  $\Delta mak-2(Pccg1-pp-1gfp)$  nor  $\Delta mak-1(Ptef1-pp-1-v5)$  germlings  
567 showed increased expression of *adv-1* as compared to  $\Delta mak-2$  or  $\Delta mak-1$  germlings,  
568 respectively ( $p=0.73$  and  $0.06$  respectively, Welch's t-test,  $n=8$ ). These data indicate that  
569 MAK-1 and MAK-2 are necessary for PP-1 dependent transcription of *adv-1*.  
570  
571 We next assessed the phenotypes of each misexpression mutant. In contrast to  $\Delta pp-$   
572  $1(Ptef1-adv-1-v5)$ ,  $\Delta pp-1(Ptef1-pp-1-v5)$ , or  $\Delta pp-1(Pccg1-pp-1-gfp)$  cells, misexpression of *Ptef1-*  
573 *adv-1-v5* or *Pccg1-pp-1-gfp* did not affect on the phenotype of the  $\Delta mak-2$  mutant (Figures  
574 7, S3, S6). The misexpression of *Ptef1-pp-1-v5* also had no affect on the phenotype of the  
575  $\Delta mak-1$  mutant. However, the misexpression of *Ptef1-adv-1-v5* significantly affected the  
576 growth phenotype of the  $\Delta mak-1$  mutant (Figure 7B-D). The introduction of *Ptef1-adv-1-v5*  
577 into  $\Delta mak-1$  cells was sufficient to fully rescue the growth rate defect of the  $\Delta mak-1$  mutant  
578 (Figure 7C). The  $\Delta mak-1(Ptef1-adv-1-v5)$  strain also produced significantly taller aerial  
579 hyphae than the  $\Delta mak-1$  mutant itself ( $p=3.6 \times 10^{-8}$ , Welch's t-test,  $n=6$ ) (Figure 7B), and  
580 misexpression of *Ptef1-adv-1-v5* was sufficient to rescue the compact, rosette-like colony  
581 morphology of the  $\Delta mak-1$  mutant (Figure 7D). However, the introduction of *Ptef1-adv-1-*  
582 *v5* was insufficient to rescue the communication and cell fusion defects of the  $\Delta mak-1$   
583 mutant (Figure 7E, F), including protoperithecial formation and perithecial development  
584 (Figure S6). Together these data indicate that growth defects of the  $\Delta mak-1$  mutant can be  
585 explained by a simple lack of ADV-1. However, for cell-to-cell communication, cell

586 fusion, and sexual reproduction, MAK-1 is clearly necessary, even in the presence of  
587 misexpressed *adv-1*.  
588  
589 *Δpp-1*, *Δmak-2*, and *Δmak-1* cells are sensitive to cell wall stress, and misexpression of *adv-1*  
590 or *pp-1* increases resistance in sensitive strains  
591 MAK-1 is the terminal MAP kinase in the Cell Wall Integrity (CWI) pathway, which  
592 maintains the cell wall during growth and in response to stress (Park *et al.* 2008; Maddi *et*  
593 *al.* 2012). Previous studies demonstrated that the *Δmak-1* mutant and other mutants in the  
594 CWI pathway are sensitive to the cell wall targeting drugs caspofungin and calcofluor  
595 white (Maddi *et al.* 2012). We reasoned that if *Ptef1-adv-1-v5* was sufficient to rescue the  
596 growth defects of the *Δmak-1* mutant, then misexpression of *Ptef1-adv-1-v5* might also be  
597 sufficient to suppress sensitivity to cell wall stress reagents in *Δmak-1* cells. Additionally,  
598 since our data suggested that the MAK-1 and MAK-2 pathways function upstream of  
599 both ADV-1 and PP-1, we hypothesized that *Δadv-1*, *Δpp-1*, and *Δmak-2* cells may also be  
600 more sensitive to cell wall targeting drugs.  
601  
602 To test these hypotheses, we assessed growth on agar media containing one of three  
603 different cell wall stress drugs; the β-1,3-glucan synthase inhibitor caspofungin (CA), and  
604 two different anionic dyes that bind chitin and block chitin-glucan cross-linking;  
605 calcofluor white (CFW) and congo red (CR). Wild-type and *Δadv-1* cells were mildly  
606 sensitive to all three drugs, while *Δpp-1*, *Δmak-1*, and *Δmak-2* mutants were almost  
607 completely unable to grow on all three drugs (Figure 8). Similar to our other growth  
608 phenotype data, both the *Δpp-1(Ptef1-pp-1-v5)* and *Δpp-1(Ptef1-adv-1-v5)* strains showed

609 wild-type-like resistance to all three drugs. Additionally, the misexpression of *Ptef1-adv-1-*  
610 *v5* in  $\Delta$ *mak-1* cells increased its resistance to all three drugs, although this effect was more  
611 pronounced on CA than on CFW or CR. The misexpression of *Ptef1-pp-1-v5* in  $\Delta$ *mak-1*  
612 cells modestly increased resistance on CFW only. Similarly, the misexpression of *Pccg1-pp-*  
613 *1-gfp* in  $\Delta$ *mak-2* cells modestly increased its resistance to all three drugs, while  
614 misexpression of *Ptef1-adv-1-v5* in  $\Delta$ *mak-2* cells did not affect resistance. As expected, the  
615 introduction of *Ptef1-pp-1-v5* and *Ptef1-pp-1-gfp* into the  $\Delta$ *pp-1* mutant was sufficient to  
616 complement the growth defects of the  $\Delta$ *pp-1* mutant on all three drugs (Figure S7). These  
617 data indicate that *adv-1* and *pp-1* function downstream of both MAK-2 and MAK-1 to  
618 regulate cell-wall stress responsive gene expression.

619

## 620 **DISCUSSION**

621 Our data supports a model for integrated phosphorylation and transcriptional regulation  
622 of genes involved in communication, fusion, growth, development, and cell wall stress  
623 response by a network of two MAPK pathways and two transcription factors (Figure 9).  
624 The MAK-2 pathway primarily functions upstream of PP-1, while the MAK-1/CWI  
625 pathway functions upstream of ADV-1. However, PP-1 also directly regulates  
626 transcription of *adv-1*, and there are several points of phosphorylation-mediated cross-talk  
627 between the MAK-1 and MAK-2 pathways (Maerz *et al.* 2008; Maddi *et al.* 2012;  
628 Dettmann *et al.* 2012, 2013; Leeder *et al.* 2013; Fu *et al.* 2014). Additionally, the catalytic  
629 activity of MAK-2 is essential for its function (Leeder *et al.* 2013; Jonkers *et al.* 2014).  
630 There are seven MAK-2-dependent phosphorylation sites on PP-1 (Jonkers *et al.* 2014),  
631 and the catalytic activity of MAK-2 is required for expression of many PP-1 (and ADV-1)

632 regulated genes (Leeder *et al.* 2013). Our qRT-PCR data demonstrated that both MAK-1  
633 and MAK-2 were required for PP-1 dependent transcription of *adv-1* (Figure 7A). Our  
634 data also indicate that MAK-1 influences *adv-1*-dependent transcription both directly and  
635 indirectly via MAK-2 and PP-1. These data combined with the observation that  
636 phosphorylation of MAK-2 is reduced in the  $\Delta mak-1$  mutant (Maerz *et al.* 2008;  
637 Dettmann *et al.* 2012) indicate that MAK-1 is required for full activation of MAK-2, and  
638 that MAK-2 is essential for activating or de-repressing PP-1, likely via phosphorylation.  
639 Thus, in the absence of fully-activated MAK-2, misexpression of *pp-1* alone is not  
640 sufficient to trigger transcription of *adv-1*. Additionally, our observations that MAK-2 is  
641 essential for optimal growth rate and resistance to cell wall stress despite misexpression of  
642 *pp-1* or *adv-1* (Figures 7,8) suggests that the catalytic activity of MAK-2 may also be  
643 important for post-transcriptional regulation of genes important for growth and cell wall  
644 stress response.

645  
646 The proteins that are dependent on MAK-2 for phosphorylation (either directly or  
647 indirectly) are enriched for proteins involved in growth, cell cycle progression,  
648 development, signaling, and metabolism (Jonkers *et al.* 2014). There are 40 genes that are  
649 both phosphorylated in a MAK-2-dependent manner (Jonkers *et al.* 2014) and regulated  
650 by ADV-1 or PP-1 ( $1 < \log_2 FC < -1$ ,  $p < 0.01$ , both our data and data from Dekhang *et al.*  
651 2017) (Table S3). These 40 genes include the CWI pathway MAPKK *mek-1*, two  
652 hypothetical proteins required for germling communication and fusion (*ham-9* and *ham-*  
653 *11*), one gene that modulates long-distance non-self recognition (*doc-2*), and several genes  
654 broadly involved in growth and metabolism. These genes, in addition to the other  
655 communication genes that are regulated by ADV-1 and PP-1 may represent a positive

656 feedback loop, in which pathway activation leads to reinforcement. This is particularly  
657 true where MEK-1 phosphorylates MAK-1, and then MAK-1 activates transcription of  
658 *adv-1*, which in turn activates transcription of MEK-1.

659

660 In addition to the communication and fusion genes, there are three calcium signaling  
661 genes that are both phosphorylated by MAK-2 (Jonkers *et al.* 2014) and regulated by  
662 ADV-1 and PP-1. These genes, a calcineurin binding protein ([NCU01504](#)), a calmodulin-  
663 dependent kinase ([NCU09212](#)), and a predicted Ca<sup>2+</sup>/cation channel ([NCU08283](#)) are  
664 particularly interesting because calcium is required for polarized growth, cell fusion, and  
665 stress response (Silverman-Gavrila 2003; Palma-Guerrero *et al.* 2014, 2015; Virgilio *et al.*  
666 2017). In other systems, the integration of calcium signaling pathways with MAPK  
667 pathways has been well documented. For example, in the dicot plant *Nicotiana benthamiana*,  
668 ethylene mediates crosstalk between a hormone responsive MAPK pathway and a  
669 calcium-signaling pathway (Ludwig *et al.* 2005).

670

671 Once activated, the CWI and MAK-2 pathways engage in crosstalk that modulates their  
672 responses. The signal(s) and receptor(s) involved in germling communication remain  
673 elusive, but it is likely that an unidentified receptor leads to activation of the MAK-2  
674 pathway. An individual receptor may activate both CWI and MAK-2 pathways, similar  
675 to how a receptor-associated-Ras-GTPase activates both the ERK pathway (*mak-2*  
676 ortholog) and the PI3K-TORC1 MAPK pathway to regulate cell survival, proliferation,  
677 and metabolism in mammalian cells (Mendoza *et al.* 2011). Alternatively, there could be  
678 more than one receptor such that some receptors lead to activation of the MAK-2  
679 pathway, while other receptors lead to activation of the CWI pathway. The cell wall

680 sensors HAM-7 and WSC-1 both function in the CWI pathway and are required for  
681 phosphorylation of MAK-1, and to a lesser extent MAK-2 (Maddi *et al.* 2012). However,  
682 *ham-7* is essential for germling fusion while *wsc-1* is dispensable, indicating that these two  
683 inputs are differentially interpreted through the CWI pathway. The current model  
684 suggests that the MAK-2 pathway is primarily activated or repressed by the sensing of  
685 extracellular “self” or “non-self” signals, similar to the orthologous pheromone sensing  
686 pathway in yeast (Heller *et al.* 2016). Once activated, the MAK-2 pathway works with the  
687 CWI pathway to coordinate growth and prepare for cell fusion by regulating expression  
688 of genes involved in adhesion, cell wall remodeling, membrane-merging, and post-fusion  
689 non-self recognition. Crosstalk reinforces signaling between these pathways when the  
690 integrity of the cell wall is maintained and an extracellular “self” signal is present.  
691 However, if cell wall integrity is compromised or if extracellular signaling is dampened,  
692 then signaling through both the CWI pathway and the MAK-2 is adjusted to confer the  
693 correct response to cell wall stress or termination of communication.

694

695 MAP kinases are evolutionarily conserved central regulators for a broad range of cellular  
696 processes (Caffrey *et al.* 1999; Xu *et al.* 2016). Crosstalk between MAPK pathways allows  
697 for efficient integration of multiple inputs into multiple outputs while also increasing the  
698 robustness and plasticity of a signaling network (Jordan *et al.* 2000; Barabási and Oltvai  
699 2004; Komarova *et al.* 2005). In *S. cerevisiae*, the CWI pathway and the osmotic stress  
700 (HOG) MAPK pathway respond to environmental stress by integrating input from  
701 several different cell-surface sensors via cross-activation and downstream crosstalk, which  
702 results in a transcriptional response controlled by several different transcription factors  
703 (Rodríguez-Peña *et al.* 2010). Flowering plants, such as *A. thaliana* and *Oryza sativa* have

704 complex MAPK pathways that are characterized by having several modular MAPKKKs  
705 and MAPKs for each individual MAPKK (Chardin *et al.* 2017). There are no clear  
706 orthologs to the CWI or MAK-2 pathways in plants, however similar signaling networks  
707 exist. For example, in *A. thaliana*, crosstalk between MAPK pathways integrates the  
708 response to both abiotic and biotic stresses (Fujita *et al.* 2006).

709

710 In *N. crassa* and closely related *S. macrospora*, the Striatin-Interacting protein Phosphatase  
711 and Kinase (STRIPAK) complex regulates MAPK signaling and mediates some crosstalk  
712 between the CWI and MAK-2 pathways. The STRIPAK complex localizes to the  
713 nuclear envelope, and mutants in the STRIPAK complex have a similar phenotype to  
714 mutants in the CWI or MAK-2 pathways (Simonin *et al.* 2010; Bernhards and Pöggeler  
715 2011; Fu *et al.* 2011; Dettmann *et al.* 2013; Nordzieke *et al.* 2015; Kück *et al.* 2016; Beier *et*  
716 *al.* 2016). Both MAK-1 and MAK-2 have been observed in the nucleus, and the amount  
717 of MAK-1 inside the nucleus is dependent on MAK-2 phosphorylating MOB-3, which is  
718 a core component of the STRIPAK complex. Furthermore, phosphorylation of MAK-1  
719 is reduced in both the  $\Delta mob-3$  mutant and another STRIPAK complex mutant,  $\Delta ham-3$   
720 (Dettmann *et al.* 2012, 2013). Phosphorylated MOB-3 is also broadly required for fruiting  
721 body development, but not chemotropic interactions or STRIPAK complex assembly at  
722 the nuclear envelope (Dettmann *et al.* 2013). These data illustrate another potential  
723 positive feedback loop in which MAK-1 is required for full phosphorylation of MAK-2,  
724 and then MAK-2 phosphorylates MOB-3, which is required for both full phosphorylation  
725 of MAK-1 and entry of MAK-1 into the nucleus. Furthermore, the STRIPAK complex  
726 clearly mediates CWI-MAK-2 pathway cross talk and modulates the output of both  
727 pathways. Future experiments will dissect the interconnected signaling network of the



728 STRIPAK complex, the CWI pathway, and the MAK-2 pathway. Additionally, further  
729 characterization of cell-to-cell communication proteins will reveal novel and potentially  
730 conserved features of cell-to-cell communication, cell wall dissolution, and membrane  
731 merger across the fungal kingdom.

732

733

#### 734 **DATA AVAILABILITY STATEMENT**

735 DAP-seq raw data is available at the NCBI Sequence Read Archive with accession  
736 number (SRP133627). RNAseq raw data (.fastq) is available at the NCBI Sequence Read  
737 Archive, accession number SRP133239. Differential expression analysis outputs are  
738 included with this publication as File S1. File S2 includes detailed information about the  
739 155 differentially expressed genes that we focused on. Results from analyzing DAP-seq  
740 data are in File S3.

741

#### 742 **ACKNOWLEDGEMENTS**

743 This work was funded by a grant from the National Science Foundation to NLG  
744 (MCB1412411). MSF was supported by NIH Genetics training grant #5T32GM007127-  
745 40. VWW was supported by NIH Genetics training grant # 5T32GM007127-39.  
746 We acknowledge the use of deletion strains generated by Grant P01 GM068087  
747 “Functional Analysis of a Model Filamentous Fungus,” which are publicly available at the  
748 FGSC. The RNAseq library prep and sequencing was carried out at the DNA  
749 Technologies and Expression Analysis Cores at the UC Davis Genome Center, supported  
750 by NIH Shared Instrumentation Grant 1S10OD010786-01.

751

752 **REFERENCES**

- 753 Barabási A. L., Oltvai Z. N., 2004 Network biology: understanding the cell's functional  
754 organization. *Nat. Rev. Genet.* 5: 101–113.
- 755 Bastiaans E., Debets A. J. M., Aanen D. K., 2015 Experimental demonstration of the  
756 benefits of somatic fusion and the consequences for allorecognition. *Evolution* 69–  
757 4: 1091–1099.
- 758 Beier A., Teichert I., Krisp C., Wolters D. A., Kück U., 2016 Catalytic Subunit 1 of  
759 Protein Phosphatase 2A Is a Subunit of the STRIPAK Complex and Governs  
760 Fungal Sexual Development. *mBio* 7: e00870-16.
- 761 Bennett L. D., Beremand P., Thomas T. L., Bell-Pedersen D., 2013 Circadian Activation  
762 of the Mitogen-Activated Protein Kinase MAK-1 Facilitates Rhythms in Clock-  
763 Controlled Genes in *Neurospora crassa*. *Eukaryot. Cell* 12: 59–69.
- 764 Bernhards Y., Pöggeler S., 2011 The phocein homologue SmMOB3 is essential for  
765 vegetative cell fusion and sexual development in the filamentous ascomycete  
766 *Sordaria macrospora*. *Curr. Genet.* 57: 133–149.
- 767 Blackwell E., Kim H. J. N., Stone D. E., 2007 The pheromone-induced nuclear  
768 accumulation of the Fus3 MAPK in yeast depends on its phosphorylation state  
769 and on Dig1 and Dig2. *BMC Cell Biol.* 8: 44.
- 770 Caffrey D. R., O'Neill L. A., Shields D. C., 1999 The evolution of the MAP kinase  
771 pathways: coduplication of interacting proteins leads to new signaling cascades. *J.*  
772 *Mol. Evol.* 49: 567–582.

- 773 Chardin C., Schenk S. T., Hirt H., Colcombet J., Krapp A., 2017 Review: Mitogen-  
774 Activated Protein Kinases in nutritional signaling in *Arabidopsis*. Plant Sci. 260:  
775 101–108.
- 776 Colot H. V., Park G., Turner G. E., Ringelberg C., Crew C., *et al.*, 2006 A high-  
777 throughput gene knockout procedure for *Neurospora* reveals functions for multiple  
778 transcription factors. Proc. Natl. Acad. Sci. 103: 13837–13842.
- 779 Dekhang R., Wu C., Smith K. M., Lamb T. M., Peterson M., *et al.*, 2017 The *Neurospora*  
780 Transcription Factor ADV-1 Transduces Light Signals and Temporal  
781 Information to Control Rhythmic Expression of Genes Involved in Cell Fusion.  
782 Genes | Genomes | Genetics 7: 129–142.
- 783 Dettmann A., Illgen J., März S., Schürg T., Fleissner A., *et al.*, 2012 The NDR Kinase  
784 Scaffold HYM1/MO25 Is Essential for MAK2 MAP Kinase Signaling in  
785 *Neurospora crassa*. PLoS Genet. 8: 1–14.
- 786 Dettmann A., Heilig Y., Ludwig S., Schmitt K., Illgen J., *et al.*, 2013 HAM-2 and HAM-3  
787 are central for the assembly of the *Neurospora* STRIPAK complex at the nuclear  
788 envelope and regulate nuclear accumulation of the MAP kinase MAK-1 in a  
789 MAK-2-dependent manner. Mol. Microbiol. 90: 796–812.
- 790 Dettmann A., Heilig Y., Valerius O., Ludwig S., Seiler S., 2014 Fungal Communication  
791 Requires the MAK-2 Pathway Elements STE-20 and RAS-2, the NRC-1 Adapter  
792 STE-50 and the MAP Kinase Scaffold HAM-5. PLoS Genet. 10: e1004762.

- 793 Ding C., Festa R. A., Chen Y.-L., Espart A., Palacios Ò., *et al.*, 2013 *Cryptococcus neoformans*  
794 Copper Detoxification Machinery Is Critical for Fungal Virulence. *Cell Host*  
795 *Microbe* 13: 265–276.
- 796 Engh I., Nowrousian M., Kück U., 2010 *Sordaria macrospora*, a model organism to study  
797 fungal cellular development. *Eur. J. Cell Biol.* 89: 864–872.
- 798 Errede B., Ammerer G., 1989 STE12, a protein involved in cell-type-specific  
799 transcription and signal transduction in yeast, is part of protein-DNA complexes.  
800 *Genes Dev.* 3: 1349–1361.
- 801 Fleissner A., Diamond S., Glass N. L., 2008 The *Saccharomyces cerevisiae* PRM1 Homolog  
802 in *Neurospora crassa* Is Involved in Vegetative and Sexual Cell Fusion Events but  
803 Also Has Post fertilization Functions. *Genetics* 181: 497–510.
- 804 Fleissner A., Leeder A. C., Roca M. G., Read N. D., Glass N. L., 2009 Oscillatory  
805 recruitment of signaling proteins to cell tips promotes coordinated behavior  
806 during cell fusion. *Proc. Natl. Acad. Sci.* 106: 19387–19392.
- 807 Fleissner A., Herzog S., 2016 Signal exchange and integration during self-fusion in  
808 filamentous fungi. *Semin. Cell Dev. Biol.*
- 809 Freitag M., Hickey P. C., Raju N. B., Selker E. U., Read N. D., 2004 GFP as a tool to  
810 analyze the organization, dynamics and function of nuclei and microtubules in  
811 *Neurospora crassa*. *Fungal Genet. Biol.* 41: 897–910.

- 812 Fu C., Iyer P., Herkal A., Abdullah J., Stout A., *et al.*, 2011 Identification and  
813 Characterization of Genes Required for Cell-to-Cell Fusion in *Neurospora crassa*.  
814 Eukaryot. Cell 10: 1100–1109.
- 815 Fu C., Ao J., Dettmann A., Seiler S., Free S. J., 2014 Characterization of the *Neurospora*  
816 *crassa* Cell Fusion Proteins, HAM-6, HAM-7, HAM-8, HAM-9, HAM-10,  
817 AMPH-1 and WHI-2. PLoS ONE 9: e107773.
- 818 Fujita M., Fujita Y., Noutoshi Y., Takahashi F., Narusaka Y., *et al.*, 2006 Crosstalk  
819 between abiotic and biotic stress responses: a current view from the points of  
820 convergence in the stress signaling networks. Curr. Opin. Plant Biol. 9: 436–442.
- 821 Garnjobst L., Wilson J. F., 1952 Heterocaryosis and protoplasmic incompatibility in  
822 *Neurospora crassa*. Proc. Natl. Acad. Sci. 42: 613–618.
- 823 Glass N. L., Vollmer S., Staben C., Grotelueschen J., Metzenberg R. L., *et al.*, 1988  
824 DNAs of the two mating-type alleles of *Neurospora crassa* are highly dissimilar.  
825 Science 241: 570–573.
- 826 Glass N. L., Kaneko I., 2003 Fatal Attraction: NonselF Recognition and Heterokaryon  
827 Incompatibility in Filamentous Fungi. Eukaryot. Cell 2: 1–8.
- 828 Glass N. L., 2004 Hyphal homing, fusion and mycelial interconnectedness. Trends  
829 Microbiol. 12: 135–141.
- 830 Han K.-H., Kim J. H., Moon H., Kim S., Lee S.-S., *et al.*, 2008 The *Aspergillus nidulans*  
831 *esdC* (early sexual development) gene is necessary for sexual development and is

- 832 controlled by *veA* and a heterotrimeric G protein. *Fungal Genet. Biol.* 45: 310–  
833 318.
- 834 Harner M. E., Unger A. K., Izawa T., Walther D. M., Özbalci C., *et al.*, 2014 Aim24 and  
835 MICOS modulate respiratory function, tafazzin-related cardiolipin modification  
836 and mitochondrial architecture. *Elife* 3:e01684.
- 837 Heller J., Zhao J., Rosenfield G., Kowbel D. J., Gladieux P., *et al.*, 2016 Characterization  
838 of Greenbeard Genes Involved in Long-Distance Kind Discrimination in a  
839 Microbial Eukaryote. *PLOS Biol.* 14: e1002431.
- 840 Heller J., Clavé C., Gladieux P., Saupe S. J., Glass N. L., 2018 NLR surveillance of  
841 essential SEC-9 SNARE proteins induces programmed cell death upon  
842 allorecognition in filamentous fungi. *Proc. Natl. Acad. Sci.* Epub ahead of print.
- 843 Hernández-Galván M., Cano-Domínguez N., Robledo-Briones A., Castro-Longoria E.,  
844 Lichius A., *et al.*, 2015 The tetraspanin PLS-1 is required for NOX-1 and NOX-2  
845 functions in cell fusion, cell growth and differentiation in the fungus *Neurospora*  
846 *crassa*. In: *Fungal Genetics Reports*, 61(Suppl). Pacific Grove, CA, p. 66.
- 847 Hickey P. C., Jacobson D. J., Read N. D., Glass N. L., 2002 Live-cell imaging of  
848 vegetative hyphal fusion in *Neurospora crassa*. *Fungal Genet. Biol.* 37: 109–119.
- 849 Jonkers W., Leeder A. C., Ansong C., Wang Y., Yang F., *et al.*, 2014 HAM-5 Functions  
850 As a MAP Kinase Scaffold during Cell Fusion in *Neurospora crassa*. *PLoS Genet.*  
851 10: e1004783.

- 852 Jordan J. D., Landau E. M., Iyengar R., 2000 Signaling networks: the origins of cellular  
853 multitasking. *Cell* 103: 193–200.
- 854 Kaneko I., Dementhon K., Xiang Q., Glass N. L., 2006 Nonallelic Interactions Between  
855 *het-c* and a Polymorphic Locus, *pin-c*, Are Essential for Nonself Recognition and  
856 Programmed Cell Death in *Neurospora crassa*. *Genetics* 172: 1545–1555.
- 857 Kim H., Borkovich K. A., 2004 A pheromone receptor gene, *pre-1*, is essential for mating  
858 type-specific directional growth and fusion of trichogynes and female fertility in  
859 *Neurospora crassa*: Pheromone response pathway in *N. crassa*. *Mol. Microbiol.* 52:  
860 1781–1798.
- 861 Kim H., Borkovich K. A., 2006 Pheromones Are Essential for Male Fertility and  
862 Sufficient To Direct Chemotropic Polarized Growth of Trichogynes during  
863 Mating in *Neurospora crassa*. *Eukaryot. Cell* 5: 544–554.
- 864 Kim D., Pertea G., Trapnell C., Pimentel H., Kelley R., *et al.*, 2013 TopHat2: accurate  
865 alignment of transcriptomes in the presence of insertions, deletions and gene  
866 fusions. *Genome Biol.* 14: R36.
- 867 Komarova N. L., Zou X., Nie Q., Bardwell L., 2005 A theoretical framework for  
868 specificity in cell signaling. *Mol. Syst. Biol.* 1: E1–E5.
- 869 Krzywinski M., Schein J., Birol I., Connors J., Gascoyne R., *et al.*, 2009 Circos: an  
870 information aesthetic for comparative genomics. *Genome Res.* 19: 1639–1645.

- 871 Kück U., Beier A. M., Teichert I., 2016 The composition and function of the striatin-  
872 interacting phosphatases and kinases (STRIPAK) complex in fungi. *Fungal Genet.*  
873 *Biol.* 90: 31–38.
- 874 Lalucque H., Malagnac F., Green K., Gautier V., Grognet P., *et al.*, 2016 IDC2 and  
875 IDC3, two genes involved in cell non-autonomous signaling of fruiting body  
876 development in the model fungus *Podospora anserina*. *Dev. Biol.* 421: 126–138.
- 877 Langmead B., Trapnell C., Pop M., Salzberg S. L., 2009 Ultrafast and memory-efficient  
878 alignment of short DNA sequences to the human genome. *Genome Biol.* 10: R25.
- 879 Leeder A. C., Jonkers W., Li J., Glass N. L., 2013 Early Colony Establishment in  
880 *Neurospora crassa* Requires a MAP Kinase Regulatory Network. *Genetics* 195: 883–  
881 898.
- 882 Li D., 2005 A Mitogen-Activated Protein Kinase Pathway Essential for Mating and  
883 Contributing to Vegetative Growth in *Neurospora crassa*. *Genetics* 170: 1091–1104.
- 884 Li H., Handsaker B., Wysoker A., Fennell T., Ruan J., *et al.*, 2009 The Sequence  
885 Alignment/Map format and SAMtools. *Bioinformatics* 25: 2078–2079.
- 886 Livak K. J., Schmittgen T. D., 2001 Analysis of Relative Gene Expression Data Using  
887 Real-Time Quantitative PCR and the  $2^{-\Delta\Delta CT}$  Method. *Methods* 25: 402–408.
- 888 Love M. I., Huber W., Anders S., 2014 Moderated estimation of fold change and  
889 dispersion for RNA-seq data with DESeq2. *Genome Biol.* 15:550.



- 890 Ludwig A. A., Saitoh H., Felix G., Freymark G., Miersch O., *et al.*, 2005 Ethylene-  
891 mediated cross-talk between calcium-dependent protein kinase and MAPK  
892 signaling controls stress responses in plants. *Proc. Natl. Acad. Sci. U. S. A.* 102:  
893 10736–10741.
- 894 Maddi A., Dettman A., Fu C., Seiler S., Free S. J., 2012 WSC-1 and HAM-7 Are MAK-  
895 1 MAP Kinase Pathway Sensors Required for Cell Wall Integrity and Hyphal  
896 Fusion in *Neurospora crassa*. *PLoS ONE* 7: e42374.
- 897 Maerz S., Ziv C., Vogt N., Helmstaedt K., Cohen N., *et al.*, 2008 The Nuclear Dbf2-  
898 Related Kinase COT1 and the Mitogen-Activated Protein Kinases MAK1 and  
899 MAK2 Genetically Interact to Regulate Filamentous Growth, Hyphal Fusion and  
900 Sexual Development in *Neurospora crassa*. *Genetics* 179: 1313–1325.
- 901 Masloff S., Pöggeler S., Kück U., 1999 The *pro1+* gene from *Sordaria macrospora* encodes a  
902 C6 zinc finger transcription factor required for fruiting body development.  
903 *Genetics* 152: 191–199.
- 904 Masloff S., Jacobsen S., Pöggeler S., Kück U., 2002 Functional analysis of the C<sub>6</sub> zinc  
905 finger gene *pro1* involved in fungal sexual development. *Fungal Genet. Biol.* 36:  
906 107–116.
- 907 McCarthy D. J., Chen Y., Smyth G. K., 2012 Differential expression analysis of  
908 multifactor RNA-Seq experiments with respect to biological variation. *Nucleic  
909 Acids Res.* 40: 4288–4297.

- 910 Mendoza M. C., Er E. E., Blenis J., 2011 The Ras-ERK and PI3K-mTOR pathways:  
911 cross-talk and compensation. *Trends Biochem. Sci.* 36: 320–328.
- 912 Merlini L., Dudin O., Martin S. G., 2013 Mate and fuse: how yeast cells do it. *Open Biol.*  
913 3: 130008–130008.
- 914 Nordzicke S., Zobel T., Fränzel B., Wolters D. A., Kück U., *et al.*, 2015 A Fungal  
915 Sarcolemmal Membrane-Associated Protein (SLMAP) Homolog Plays a  
916 Fundamental Role in Development and Localizes to the Nuclear Envelope,  
917 Endoplasmic Reticulum, and Mitochondria. *Eukaryot. Cell* 14: 345–358.
- 918 Nowrousian M., Frank S., Koers S., Strauch P., Weitner T., *et al.*, 2007 The novel ER  
919 membrane protein PRO41 is essential for sexual development in the filamentous  
920 fungus *Sordaria macrospora*. *Mol. Microbiol.* 64: 923–937.
- 921 O'Malley R. C., Huang S. C., Song L., Lewsey M. G., Bartlett A., *et al.*, 2016 Cistrome  
922 and Epicistrome Features Shape the Regulatory DNA Landscape. *Cell* 165:  
923 1280–1292.
- 924 Palma-Guerrero J., Hall C. R., Kowbel D., Welch J., Taylor J. W., *et al.*, 2013 Genome  
925 Wide Association Identifies Novel Loci Involved in Fungal Communication. *PLoS*  
926 *Genet.* 9: 1–13.
- 927 Palma-Guerrero J., Leeder A. C., Welch J., Glass N. L., 2014 Identification and  
928 characterization of LFD1, a novel protein involved in membrane merger during  
929 cell fusion in *Neurospora crassa*. *Mol. Microbiol.* 92: 164–182.

- 930 Palma-Guerrero J., Zhao J., Gonçalves A. P., Starr T. L., Glass N. L., 2015 Identification  
931 and Characterization of LFD-2, a Predicted Fringe Protein Required for  
932 Membrane Integrity during Cell Fusion in *Neurospora crassa*. *Eukaryot. Cell* 14:  
933 265–277.
- 934 Pandit A., Maheshwari R., 1994 A simple method of obtaining pure microconidia in  
935 *Neurospora crassa*. *Fungal Genet. Newsl.* 41: 64–65.
- 936 Park G., Pan S., Borkovich K. A., 2008 Mitogen-Activated Protein Kinase Cascade  
937 Required for Regulation of Development and Secondary Metabolism in *Neurospora*  
938 *crassa*. *Eukaryot. Cell* 7: 2113–2122.
- 939 Perbal B., 2003 Communication is the key. *Cell Commun. Signal.* 1: 3.
- 940 Read N. D., Goryachev A. B., Lichius A., 2012 The mechanistic basis of self-fusion  
941 between conidial anastomosis tubes during fungal colony initiation. *Fungal Biol.*  
942 *Rev.* 26: 1–11.
- 943 Richard F., Glass N. L., Pringle A., 2012 Cooperation among germinating spores  
944 facilitates the growth of the fungus, *Neurospora crassa*. *Biol. Lett.* 8: 419–422.
- 945 Roberts A., Trapnell C., Donaghey J., 2010 Improving RNA-Seq expression estimates by  
946 correcting for fragment bias.
- 947 Robinson M. D., McCarthy D. J., Smyth G. K., 2010 edgeR: a Bioconductor package for  
948 differential expression analysis of digital gene expression data. *Bioinformatics* 26:  
949 139–140.

- 950 Rodríguez-Peña J. M., García R., Nombela C., Arroyo J., 2010 The high-osmolarity  
951 glycerol (HOG) and cell wall integrity (CWI) signalling pathways interplay: a yeast  
952 dialogue between MAPK routes. *Yeast* 27: 495–502.
- 953 Saupe S. J., 2000 Molecular genetics of heterokaryon incompatibility in filamentous  
954 ascomycetes. *Microbiol. Mol. Biol. Rev.* 64: 489–502.
- 955 Silverman-Gavrila L. B., 2003 Calcium gradient dependence of *Neurospora crassa* hyphal  
956 growth. *Microbiology* 149: 2475–2485.
- 957 Simonin A. R., Rasmussen C. G., Yang M., Glass N. L., 2010 Genes encoding a striatin-  
958 like protein (*ham-3*) and a forkhead associated protein (*ham-4*) are required for  
959 hyphal fusion in *Neurospora crassa*. *Fungal Genet. Biol.* 47: 855–868.
- 960 Simonin A., Palma-Guerrero J., Fricker M., Glass N. L., 2012 Physiological Significance  
961 of Network Organization in Fungi. *Eukaryot. Cell* 11: 1345–1352.
- 962 Smith K. M., Sancar G., Dekhang R., Sullivan C. M., Li S., *et al.*, 2010 Transcription  
963 Factors in Light and Circadian Clock Signaling Networks Revealed by  
964 Genomewide Mapping of Direct Targets for *Neurospora* White Collar Complex.  
965 *Eukaryot. Cell* 9: 1549–1556.
- 966 Teichert I., Steffens E. K., Schnaß N., Fränzel B., Krisp C., *et al.*, 2014 PRO40 Is a  
967 Scaffold Protein of the Cell Wall Integrity Pathway, Linking the MAP Kinase  
968 Module to the Upstream Activator Protein Kinase C. *PLoS Genet.* 10: e1004582.
- 969 Virgilio S., Cupertino F. B., Ambrosio D. L., Bertolini M. C., 2017 Regulation of the  
970 reserve carbohydrate metabolism by alkaline pH and calcium in *Neurospora crassa*

- 971 reveals a possible cross-regulation of both signaling pathways. BMC Genomics  
972 18:457.
- 973 Vogel H. J., 1956 A convenient growth medium for *Neurospora* (Medium N). Microb.  
974 Genet. Bull.: 42–43.
- 975 Weichert M., Lichius A., Priegnitz B.-E., Brandt U., Gottschalk J., *et al.*, 2016  
976 Accumulation of specific sterol precursors targets a MAP kinase cascade  
977 mediating cell–cell recognition and fusion. Proc. Natl. Acad. Sci. 113(42):11877-  
978 11882.
- 979 Weirauch M. T., Yang A., Albu M., Cote A. G., Montenegro-Montero A., *et al.*, 2014  
980 Determination and Inference of Eukaryotic Transcription Factor Sequence  
981 Specificity. Cell 158: 1431–1443.
- 982 Westergaard M., Mitchell H. K., 1947 *Neurospora* V. A Synthetic Medium Favoring  
983 Sexual Reproduction. Am. J. Bot. 34: 573.
- 984 Xiong Y., Coradetti S. T., Li X., Gritsenko M. A., Clauss T., *et al.*, 2014 The proteome  
985 and phosphoproteome of *Neurospora crassa* in response to cellulose, sucrose and  
986 carbon starvation. Fungal Genet. Biol. 72: 21–33.
- 987 Xu C., Liu R., Zhang Q., Chen X., Qian Y., *et al.*, 2016 The diversification of  
988 evolutionarily conserved MAPK cascades correlates with the evolution of fungal  
989 species and development of lifestyles. Genome Biol. Evol.: evw051.
- 990 Zhang Y., Liu T., Meyer C. A., Eeckhoutte J., Johnson D. S., *et al.*, 2008 Model-based  
991 Analysis of ChIP-Seq (MACS). Genome Biol. 9: R137.



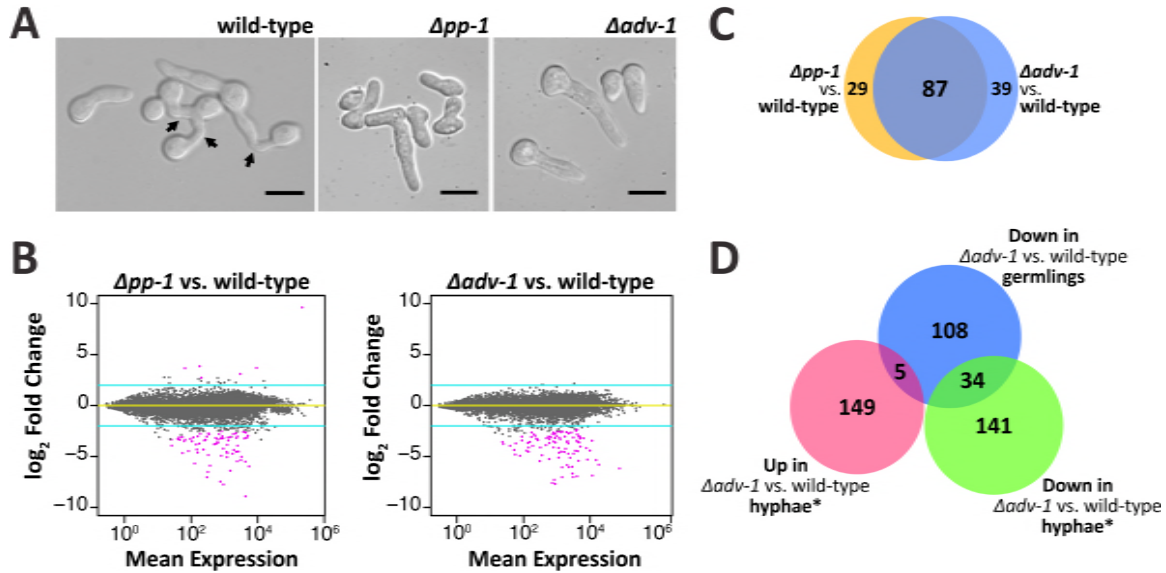

993

994 **Figure 1. ADV-1 and PP-1 have a shared regulon in germlings.**

995 **(A)** Microscopic images showing germling morphology at the time point when we  
 996 extracted RNA for RNAseq. Arrows indicate fusion events. **(B)** MA plots depicting total  
 997 RNAseq data for each transcription factor mutant versus the parental wild-type strain.  
 998 Turquoise lines denote threshold of  $2 < \log_2 FC < -2$ , and pink points indicate genes with  
 999 significant differential expression ( $p < 0.01$ , DESeq2). **(C)** Number of genes significantly  
 1000 down regulated in each mutant as compared to the wild-type parental strain (consensus  
 1001 between CuffDiff, EdgeR, and DESeq2,  $\log_2 FC < -2$  and adjusted  $p$ -value  $< 0.01$ ). Blue  
 1002 circle is  $\Delta adv-1$  compared to wild-type germlings, orange circle is  $\Delta pp-1$  compared to wild-  
 1003 type germlings. **(D)** Number of significantly differentially expressed genes in  $\Delta adv-1$  as  
 1004 compared to the parental wild-type strain in hyphae\* compared to germlings ( $-$   
 1005  $2 > \log_2 FC > 2$  and  $p < 0.01$ , Cuffdiff). \*Hyphal data from Dekhang *et al.* 2017 where  
 1006 RNAseq data was collected from three different time points. Genes were included if they  
 1007 were differentially expressed during at least one time point.

1008





1017 green). Blue lines indicate genes that are regulated by ADV-1, orange lines indicate genes  
1018 that are regulated by PP-1, and line thickness is proportional to the fold-change difference  
1019 in expression between the transcription factor mutant and wild type germlings. Gene IDs  
1020 are highlighted to indicate the presence of at least one ADV-1 (blue) or PP-1 (orange)  
1021 binding site in the promoter region within 2kb upstream of ATG. Five genes were bound  
1022 by both ADV-1 and PP-1; these gene IDs are highlighted with blue and have an  
1023 additional orange highlight immediately adjacent to the gene ID. PP-1 binding sites were  
1024 determined by consensus between DAPseq and RNAseq, and ADV-1 binding sites are  
1025 the consensus between DAPseq, RNAseq, and ChIPseq datasets. ChIPseq data is  
1026 available from Dekhang *et al.* 2017, in which ChIPseq was performed at three different  
1027 time points. Genes were included here if they were bound by ADV-1 during at least one  
1028 time point. This list of 155 genes is significantly enriched for ADV-1 binding sites  
1029 ( $p=0.0004$ , Fisher's Exact Test), but not PP-1 binding sites ( $p=0.02$ , Fisher's Exact Test).  
1030

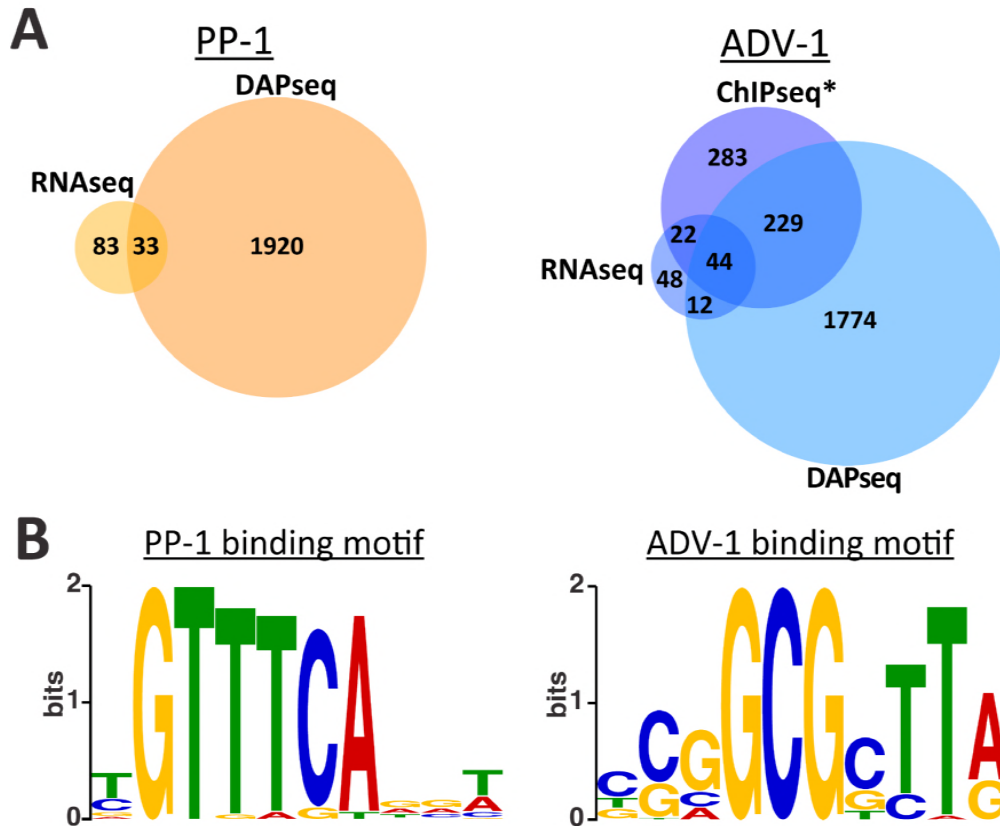

1031

1032 **Figure 3. DAPseq identifies promoters bound by ADV-1 or PP-1.**

1033 **(A)** Number of genes that are down regulated in *Δpp-1* germlings (RNAseq) or bound by  
 1034 PP-1 (DAPseq) (left panel). The number of genes that are down regulated in *Δadv-1*  
 1035 germlings (RNAseq) or bound by ADV-1 (DAPseq and ChIPseq) (right panel). Down  
 1036 regulated genes were identified by consensus between CuffDiff, EdgeR, and DESeq2,  
 1037  $\log_2FC < -2$  and adjusted p-value  $< 0.01$  (compare with Figure 1C). Genes bound by each  
 1038 transcription factor were counted if the transcription factor was bound within 2kb  
 1039 upstream of the ATG ( $p < 0.001$ ). \*ADV-1 ChIPseq data is available from Dekhang *et al.*  
 1040 2017, in which ChIPseq was performed at three different time points. Genes were  
 1041 included here if they were bound by ADV-1 during at least one time point. **(B)**  
 1042 Consensus DNA binding motif for PP-1 or ADV-1 based on DAPseq data.

1043

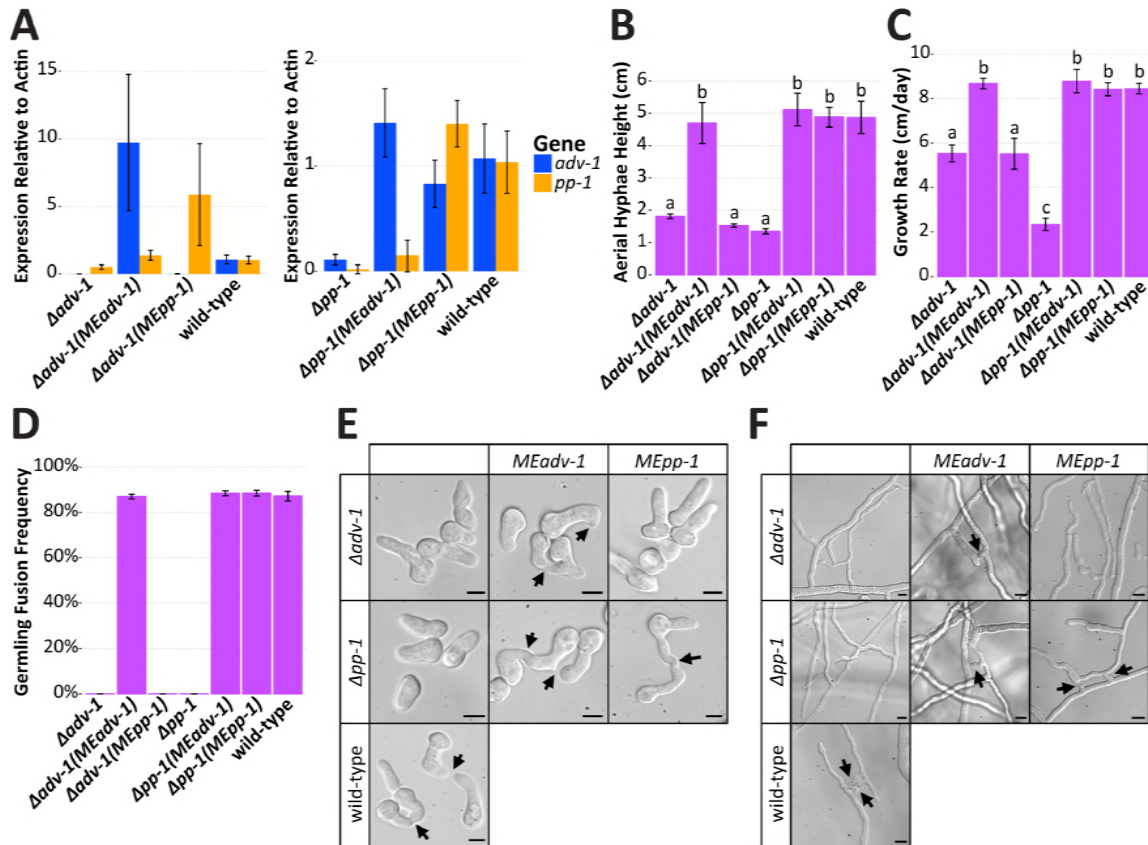

1044

1045

**Figure 4. Misexpression of *adv-1* suppresses the phenotype of the *App-1***

1046

**mutant. (A)** qRT-PCR data showing mRNA expression levels of *adv-1* and *pp-1* in  $\Delta adv-$

1047

*1* (*Ptef1-adv-1-v5; his-3 (MEadv-1)*) and  $\Delta adv-1$  (*Ptef1-pp-1-v5; his-3 (MEpp-1)*) germlings (left

1048

panel) and in  $\Delta pp-1$  (*Ptef1-adv-1-v5; his-3 (MEadv-1)*) and  $\Delta pp-1$  (*Ptef1-pp1-v5;his-3 (MEpp-*

1049

*1)*) germlings (right panel) compared to the wild type parental strain. **(B)** Mean height of

1050

aerial hyphae of strains in (A) three days after inoculation (ANOVA+TukeyHSD,

1051

$p < 0.0001$ ,  $n = 6$ ). **(C)** Mean growth rate per 24 hrs of strains in (A) measured over 4 days

1052

(ANOVA+TukeyHSD,  $p < 0.01$ ,  $n = 3$ ). **(D)** Mean frequency of communication and fusion

1053

between pairs of germlings for each strain in (A) ( $n = 3$ , 400-700 germling pairs counted

1054

per sample). For all bar plots, error bars indicate standard deviation. **(E)** Photos of the

1055

germlings (scale bars =  $5\mu\text{m}$ ) and **(F)** hyphae (scale bars =  $10\mu\text{m}$ ) for each strain in (A).

1056 Arrows indicate chemotropic interactions and successful cell fusion.

1057

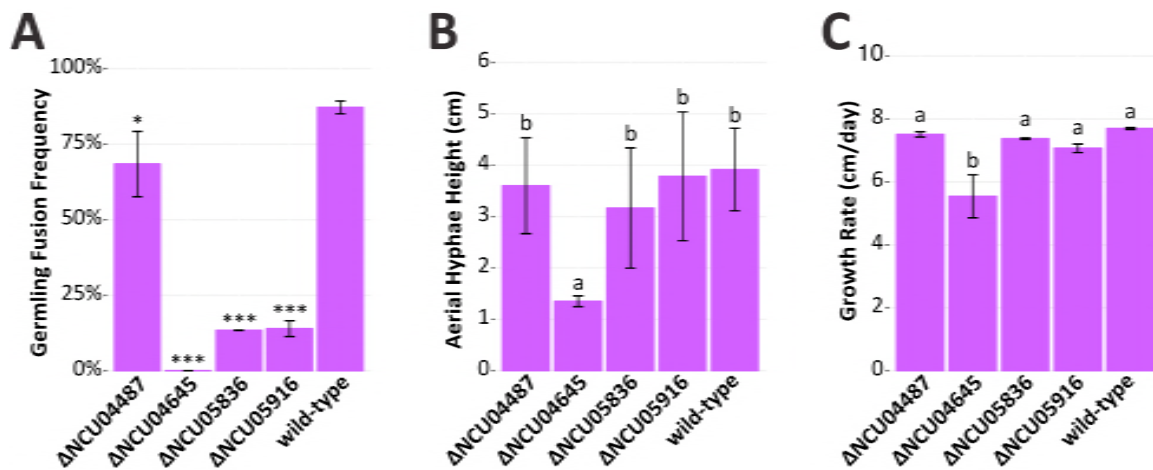

1058

1059 **Figure 5. Four ADV-1-regulated genes are required for normal germling**  
1060 **fusion and growth.**

1061 A screen of 110 deletion mutants of the 155 genes regulated by ADV-1 and/or PP-1

1062 revealed that strains carrying mutations in four genes have cell fusion defects. The

1063 remaining 151 mutants either have a previously described germling fusion defect, wild-

1064 type like germling fusion phenotype, or homokaryotic deletion mutants are not available

1065 in the deletion collection. **(A)** ΔNCU04487, ΔNCU04645, ΔNCU05836 and

1066 ΔNCU05916 mutants showed reduced germling fusion. Mean germling fusion frequency

1067 of each mutant and wild type (n=3, ~200-400 germling pairs counted per sample). Stars

1068 indicate a significant difference compared to the parental wild type strain (\*p=0.007,

1069 \*\*\*p<1E-7, ANOVA+TukeyHSD). **(B)** Mean height of aerial hyphae of ΔNCU04487,

1070 ΔNCU04645, ΔNCU05836 and ΔNCU05916 mutants three days after inoculation

1071 (ANOVA+TukeyHSD, p<0.0001, n=6). **(C)** Mean growth rate of ΔNCU04487,

1072 ΔNCU04645, ΔNCU05836 and ΔNCU05916 mutants per day measured over 4 days

1073 (ANOVA+TukeyHSD, p<0.01, n=2). For all bar plots, error bars indicate standard

1074 deviation.

1075

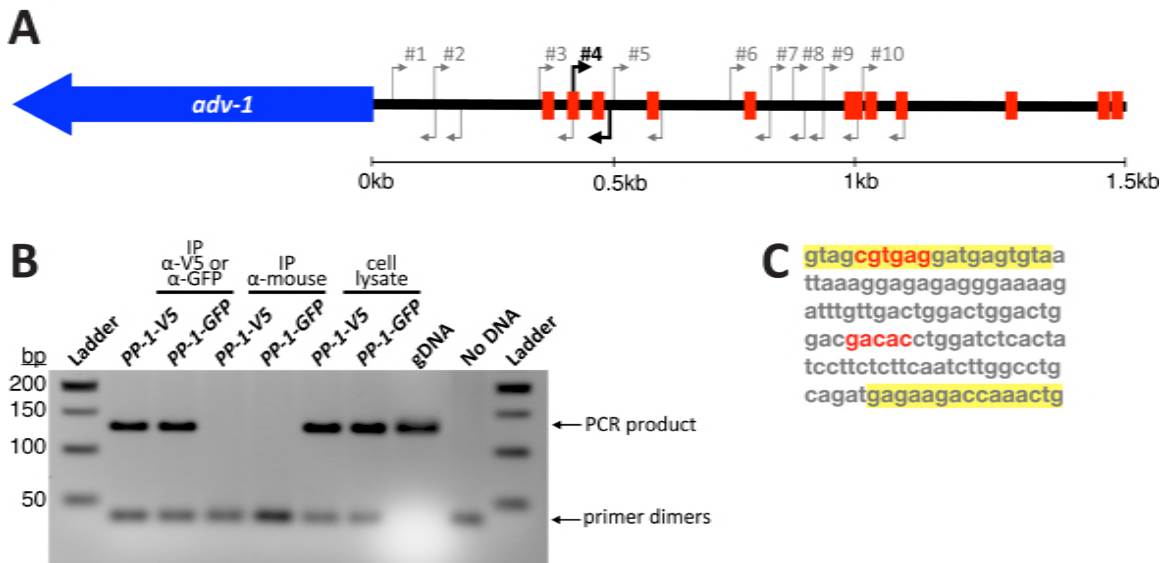

1076

1077 **Figure 6. ChIP-PCR identifies a PP-1 binding site ~500bp upstream of the**

1078 ***adv-1* ORF.**

1079 **(A)** Diagram of predicted PP-1 binding sites within 1.5kb upstream of *adv-1* ORF, based

1080 on the motif depicted in Figure 2B. Arrows indicate ten different PCR primer sets used to

1081 interrogate immunoprecipitated chromatin. **(B)** Agarose DNA gel showing results of

1082 ChIP-PCR with primer set #4. The remaining PCR results are included in Figure S5.

1083 Immunoprecipitation with *Δpp-1(Ptef1-pp-1-v5; his-3)* and *Δpp-1(Pccg1-pp-1-gfp; his-3)*

1084 strains was performed using  $\alpha$ -V5 or  $\alpha$ -GFP antibodies.  $\alpha$ -mouse antibodies were used as

1085 a negative control. Whole cell lysate and independent *N. crassa* genomic DNA were

1086 included as positive PCR controls, with a PCR reaction lacking DNA as an additional

1087 negative control. **(C)** The sequence of the PCR product in (B). Primers highlighted with

1088 yellow correspond to primer set #4 in (A), predicted PP-1 binding sites are in red.

1089

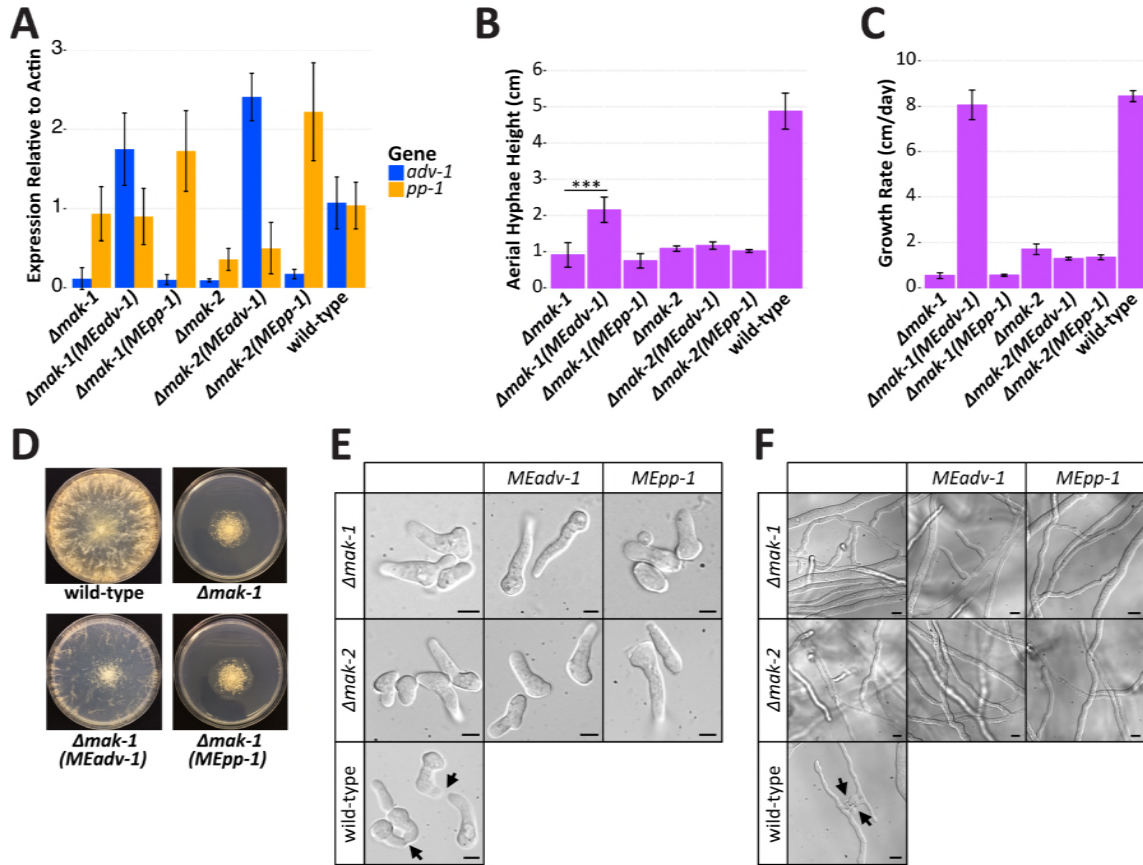

1090

1091 **Figure 7. Misexpression of *adv-1* suppresses the growth phenotype of the**

1092 ***Δmak-1* mutant. (A)** qRT-PCR data showing mRNA expression levels of *adv-1* and *pp-*

1093 *1* in  $\Delta mak-1$  (*Ptef1-adv-1-v5; his-3 (MEadv-1)*),  $\Delta mak-1$  (*Ptef1-pp-1-v5; his-3 (MEpp-1)*),  $\Delta mak-$

1094 *2* (*Ptef1-adv-1-v5; his-3 (MEadv-1)*) and  $\Delta mak-2$  (*Pccg1-pp-1-gfp; his-3 (MEpp-1)*) strains

1095 compared to *Δmak-1*, *Δmak-2* and wild type cells. **(B)** Mean height of aerial hyphae of

1096 strains in (A) three days after inoculation (ANOVA+TukeyHSD, \*\*\*p=3.6E-8, n=6). **(C)**

1097 Mean growth rate per day of strains in (A) measured over 4 days (ANOVA+TukeyHSD,

1098 p<0.01, n=3). For all bar plots, error bars indicate standard deviation. **(D)** Colony

1099 morphology of the *Δmak-1* mutant relative to the wild-type strain and the  $\Delta mak-1$  (*Ptef1-*

1100 *adv-1-v5; his-3 (MEadv-1)*) and  $\Delta mak-1$  (*Ptef1-pp-1-v5; his-3 (MEpp-1)*) strains. **(E)** Photos

1101 showing a lack of germling fusion (scale bars = 5μm) or **(F)** hyphal fusion (scale bars =

1102 10 $\mu$ m) for each strains shown in (A). Arrows indicate chemotropic interactions in the  
 1103 wild-type strain.

1104

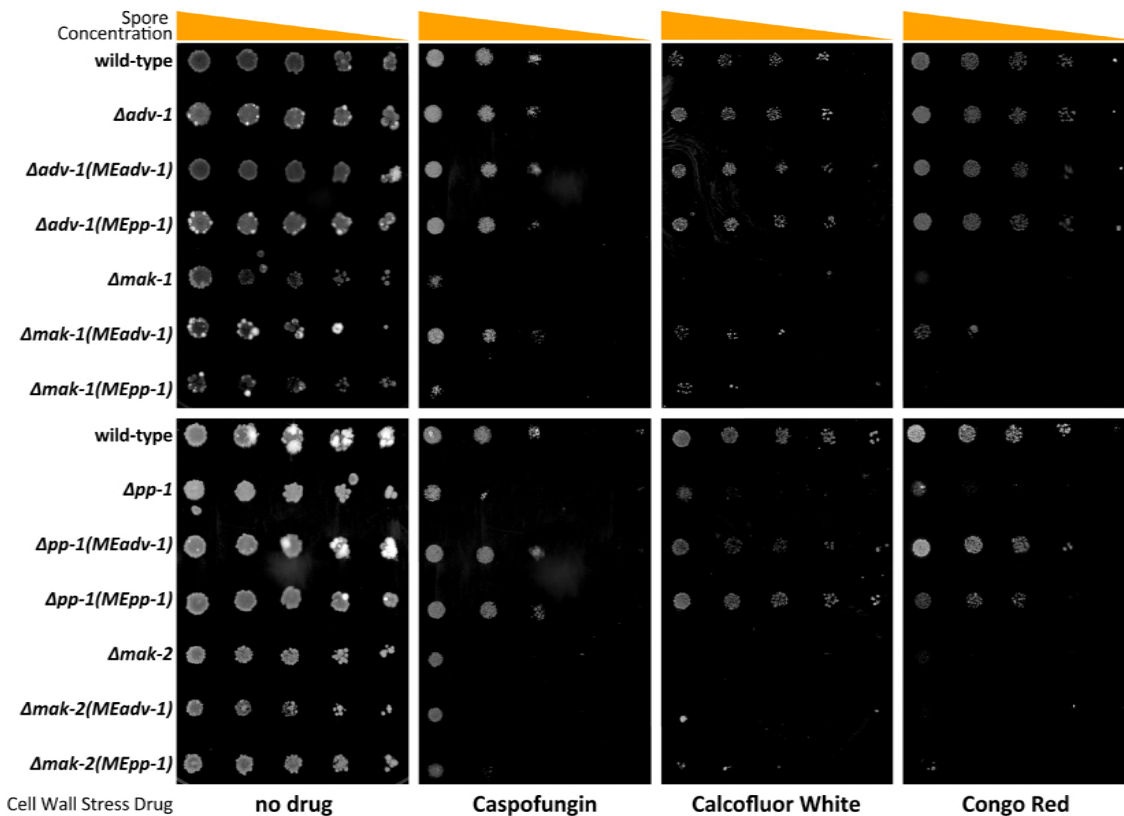

1105

Cell Wall Stress Drug

no drug

Caspofungin

Calcofluor White

Congo Red

1106 **Figure 8. Misexpression of *adv-1* restores resistance to cell wall stress**

1107 **agents in  $\Delta pp-1$  and  $\Delta mak-1$  cells.**

1108 A 1:5 serial dilution from ~5000spores/spot to ~8spores/spot was performed on  $\Delta pp-1$   
 1109 (*Ptef1-adv-1-v5; his-3 (MEadv-1)*),  $\Delta pp-1$  (*Ptef1-pp-1-v5; his-3 (MEpp-1)*),  $\Delta mak-2$  (*Ptef1-adv-1-*  
 1110 *v5; his-3 (MEadv-1)*),  $\Delta mak-2$  (*Pccg1-pp-1-gfp; his-3 (MEpp-1)*),  $\Delta adv-1$  (*Ptef1-adv-1-v5; his-3*  
 1111 *(MEadv-1)*),  $\Delta adv-1$  (*Ptef1-pp-1-v5; his-3 (MEpp-1)*),  $\Delta mak-1$  (*Ptef1-adv-1-v5; his-3 (MEadv-1)*)  
 1112 and  $\Delta mak-1$  (*Ptef1-pp-1-v5; his-3 (MEpp-1)*) cells compared to  $\Delta pp-1$ ,  $\Delta adv-1$ ,  $\Delta mak-1$ ,  $\Delta mak-$   
 1113 2, and wild-type cells. All agar media contains VMM and FGS to force colonial growth.  
 1114 Plates were incubated at 30°C for 5 days. Drug concentrations: 1.3 $\mu$ g/mL caspofungin,

1115 1.5mg/mL calcofluor white, and 1mg/mL congo red.

1116

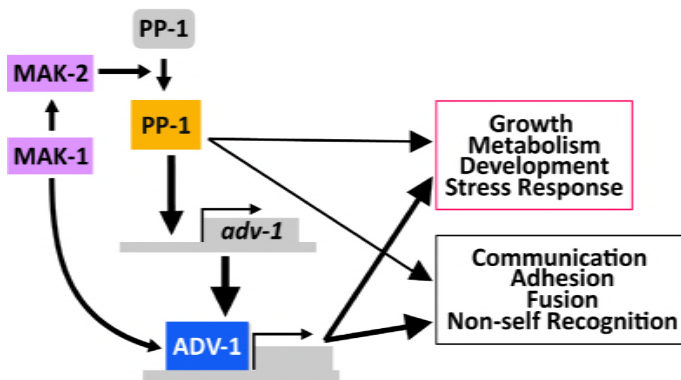

1117

1118 **Figure 9. Model for transcriptional regulation by MAK-1, MAK-2, PP-1 and**

1119 **ADV-1.** MAK-1 activates both MAK-2 and ADV-1-dependent transcription. MAK-2

1120 activates or de-represses PP-1, which is necessary for transcription of *adv-1* and other

1121 down-stream genes (inactivated PP-1 is grey, activated PP-1 is orange). PP-1 directly

1122 binds and regulates transcription of *adv-1*; ADV-1 is the direct transcriptional activator of

1123 many of the genes required for cell-to-cell communication, cell fusion, growth,

1124 development, and metabolism. Additionally, PP-1 and ADV-1 are important for

1125 mediating the cell wall stress response downstream of both MAK-1 and MAK-2. While

1126 our data indicates that ADV-1 is the primary regulatory for many downstream genes, PP-

1127 1 also contributes to the transcription of some of these genes independently of *adv-1*.

1128 Downstream gene groups are boxed with colors (magenta or black) that match the colors

1129 detailing the same groups in Figure 2.
